# Supplementary material for: Peripheral level of CD33 and Alzheimer’s disease: a bidirectional two-sample Mendelian randomization study
Source: PubMed Central journal article supplement (PMC9529877; doi:10.1038/s41398-022-02205-4), 2022-10-03
Supplement: 41398_2022_2205_MOESM1_ESM.pdf [file 41398_2022_2205_MOESM1_ESM.pdf]

**Supplementary table 1.** Description of the consortium data sets used for AD GWAS.

| Alzheimer's disease cases |          |                |                | Controls |                |                |
|---------------------------|----------|----------------|----------------|----------|----------------|----------------|
| Consortium                | <i>N</i> | Percent female | Mean AAO (s.d) | <i>N</i> | Percent female | Mean AAE (s.d) |
| ADGC                      | 14,428   | 59.3           | 71.1 (17.3)    | 14,562   | 59.3           | 76.2 (9.9)     |
| CHARGE                    | 2,137    | 67.3           | 82.6 (12)      | 13,474   | 55.8           | 76.7 (8.2)     |
| EADI                      | 2,240    | 65             | 75.4 (9.1)     | 6,631    | 60.6           | 78.9 (7.0)     |
| GERAD                     | 3,177    | 64             | 73.0 (0.2)     | 7,277    | 51.8           | 51.0 (0.1)     |
| <i>N</i>                  | 21,982   |                |                | 41,944   |                |                |

**Supplementary table 2:** IVs used in the forward MR analyses (CD33 as exposure, AD as outcome).

| exposure    id                                  | Sample.size | se      | pval      | beta    | pos         | SNP        | EA | OA | eaf    |
|-------------------------------------------------|-------------|---------|-----------|---------|-------------|------------|----|----|--------|
| CD33 on CD14+ monocyte    id:ebi-a-GCST90001946 | 1634        | 0.03378 | 1.05E-190 | -1.143  | 19:51727962 | rs3865444  | A  | C  | 0.2121 |
| CD33 on CD14+ monocyte    id:ebi-a-GCST90001946 | 1634        | 0.03612 | 6.13E-09  | -0.2111 | 19:52254351 | rs4801891  | C  | T  | 0.563  |
| CD33 on CD14+ monocyte    id:ebi-a-GCST90001946 | 1634        | 0.03593 | 6.32E-15  | 0.2828  | 19:51591138 | rs78949787 | T  | C  | 0.5535 |
| CD33 on CD14+ monocyte    id:ebi-a-GCST90001946 | 1634        | 0.06809 | 3.79E-12  | -0.4764 | 19:52897142 | rs11882720 | G  | T  | 0.0731 |
| CD33 on CD14+ monocyte    id:ebi-a-GCST90001946 | 1634        | 0.04013 | 7.97E-23  | -0.4007 | 19:51574038 | rs7351079  | G  | A  | 0.2708 |
| CD33 on CD14+ monocyte    id:ebi-a-GCST90001946 | 1634        | 0.07202 | 1.39E-09  | 0.4387  | 19:51868443 | rs58483275 | T  | C  | 0.0704 |

|                                                            |      |         |           |         |             |            |   |   |        |
|------------------------------------------------------------|------|---------|-----------|---------|-------------|------------|---|---|--------|
| CD33 on CD33+ HLA DR+ CD14dim   <br>id:ebi-a-GCST90001947  | 1577 | 0.06754 | 3.29E-10  | -0.4272 | 19:52097261 | rs58301181 | G | C | 0.0843 |
| CD33 on CD33+ HLA DR+ CD14dim   <br>id:ebi-a-GCST90001947  | 1577 | 0.04234 | 2.43E-14  | -0.326  | 19:51574038 | rs7351079  | G | A | 0.2613 |
| CD33 on CD33+ HLA DR+ CD14dim   <br>id:ebi-a-GCST90001947  | 1577 | 0.03704 | 1.35E-14  | 0.288   | 19:51588018 | rs62114147 | T | C | 0.5568 |
| CD33 on CD33+ HLA DR+ CD14dim   <br>id:ebi-a-GCST90001947  | 1577 | 0.03655 | 7.83E-184 | -1.214  | 19:51727962 | rs3865444  | A | C | 0.1934 |
| CD33 on CD33dim HLA DR+ CD11b+<br>   id:ebi-a-GCST90001948 | 1633 | 0.0387  | 3.92E-11  | -0.2575 | 1:161479745 | rs1801274  | G | A | 0.3298 |
| CD33 on CD33dim HLA DR+ CD11b+<br>   id:ebi-a-GCST90001948 | 1633 | 0.03571 | 4.04E-16  | 0.2936  | 19:51588018 | rs62114147 | T | C | 0.5508 |
| CD33 on CD33dim HLA DR+ CD11b+<br>   id:ebi-a-GCST90001948 | 1633 | 0.04    | 8.18E-22  | -0.3895 | 19:51574038 | rs7351079  | G | A | 0.271  |
| CD33 on CD33dim HLA DR+ CD11b+<br>   id:ebi-a-GCST90001948 | 1633 | 0.07133 | 6.18E-12  | 0.4941  | 19:51868443 | rs58483275 | T | C | 0.0704 |
| CD33 on CD33dim HLA DR+ CD11b+<br>   id:ebi-a-GCST90001948 | 1633 | 0.03595 | 7.66E-10  | -0.2225 | 19:52254351 | rs4801891  | C | T | 0.5628 |
| CD33 on CD33dim HLA DR+ CD11b+<br>   id:ebi-a-GCST90001948 | 1633 | 0.03358 | 2.38E-191 | -1.139  | 19:51727962 | rs3865444  | A | C | 0.2122 |
| CD33 on CD33dim HLA DR+ CD11b+<br>   id:ebi-a-GCST90001948 | 1633 | 0.06841 | 7.43E-11  | -0.4484 | 19:52897142 | rs11882720 | G | T | 0.0726 |
| CD33 on CD33dim HLA DR+ CD11b-   <br>id:ebi-a-GCST90001949 | 1634 | 0.03857 | 1.84E-11  | -0.261  | 1:161479745 | rs1801274  | G | A | 0.3299 |
| CD33 on CD33dim HLA DR+ CD11b-   <br>id:ebi-a-GCST90001949 | 1634 | 0.03992 | 2.91E-21  | -0.3832 | 19:51574038 | rs7351079  | G | A | 0.2708 |

|                                                                                      |      |         |           |         |             |            |   |   |        |
|--------------------------------------------------------------------------------------|------|---------|-----------|---------|-------------|------------|---|---|--------|
| CD33 on CD33dim HLA DR+ CD11b-   <br>id:ebi-a-GCST90001949                           | 1634 | 0.03559 | 1.24E-16  | 0.2978  | 19:51588018 | rs62114147 | T | C | 0.5511 |
| CD33 on CD33dim HLA DR+ CD11b-   <br>id:ebi-a-GCST90001949                           | 1634 | 0.03392 | 2.40E-183 | -1.119  | 19:51727962 | rs3865444  | A | C | 0.2121 |
| CD33 on CD33dim HLA DR+ CD11b-   <br>id:ebi-a-GCST90001949                           | 1634 | 0.0359  | 1.13E-08  | -0.2061 | 19:52254351 | rs4801891  | C | T | 0.563  |
| CD33 on CD33dim HLA DR+ CD11b-   <br>id:ebi-a-GCST90001949                           | 1634 | 0.105   | 7.88E-09  | -0.6094 | 19:48582916 | rs73051934 | G | A | 0.0278 |
| CD33 on CD33dim HLA DR+ CD11b-   <br>id:ebi-a-GCST90001949                           | 1634 | 0.06357 | 1.81E-10  | -0.4079 | 19:52097261 | rs58301181 | G | C | 0.0872 |
| CD33 on Granulocytic Myeloid-Derived<br>Suppressor Cells   <br>id:ebi-a-GCST90001950 | 1244 | 0.04091 | 3.22E-08  | 0.2277  | 19:51591138 | rs78949787 | T | C | 0.5691 |
| CD33 on Granulocytic Myeloid-Derived<br>Suppressor Cells   <br>id:ebi-a-GCST90001950 | 1244 | 0.04903 | 1.02E-58  | -0.8358 | 19:51731176 | rs7245846  | A | G | 0.1853 |
| CD33 on Granulocytic Myeloid-Derived<br>Suppressor Cells   <br>id:ebi-a-GCST90001950 | 1244 | 0.048   | 5.38E-09  | -0.2821 | 19:51574038 | rs7351079  | G | A | 0.2544 |
| CD33 on CD66b++ myeloid cell   <br>id:ebi-a-GCST90001951                             | 1464 | 0.04205 | 1.74E-10  | 0.2704  | 19:52161035 | rs12459503 | C | T | 0.7148 |
| CD33 on CD66b++ myeloid cell   <br>id:ebi-a-GCST90001951                             | 1464 | 0.03799 | 2.62E-12  | 0.2681  | 19:51591138 | rs78949787 | T | C | 0.5574 |
| CD33 on CD66b++ myeloid cell   <br>id:ebi-a-GCST90001951                             | 1464 | 0.04316 | 1.04E-12  | -0.3103 | 19:51574038 | rs7351079  | G | A | 0.2702 |
| CD33 on CD66b++ myeloid cell                                                         | 1464 | 0.0394  | 2.39E-108 | -0.9497 | 19:51727962 | rs3865444  | A | C | 0.2094 |

|                                                    |      |         |           |         |             |             |   |   |        |
|----------------------------------------------------|------|---------|-----------|---------|-------------|-------------|---|---|--------|
| id:ebi-a-GCST90001951                              |      |         |           |         |             |             |   |   |        |
| CD33 on Monocytic Myeloid-Derived Suppressor Cells | 1569 | 0.03884 | 1.71E-153 | -1.151  | 19:51727962 | rs3865444   | A | C | 0.1896 |
| id:ebi-a-GCST90001952                              |      |         |           |         |             |             |   |   |        |
| CD33 on Monocytic Myeloid-Derived Suppressor Cells | 1569 | 0.06721 | 1.94E-08  | -0.3795 | 19:52097261 | rs58301181  | G | C | 0.0848 |
| id:ebi-a-GCST90001952                              |      |         |           |         |             |             |   |   |        |
| CD33 on Monocytic Myeloid-Derived Suppressor Cells | 1569 | 0.03721 | 2.56E-12  | 0.2625  | 19:51588018 | rs62114147  | T | C | 0.5586 |
| id:ebi-a-GCST90001952                              |      |         |           |         |             |             |   |   |        |
| CD33 on Monocytic Myeloid-Derived Suppressor Cells | 1569 | 0.04232 | 9.03E-18  | -0.3677 | 19:51574038 | rs7351079   | G | A | 0.2604 |
| id:ebi-a-GCST90001952                              |      |         |           |         |             |             |   |   |        |
| CD33 on CD33dim HLA DR-                            | 1558 | 0.0784  | 2.26E-10  | 0.5006  | 1:247719769 | rs56043070  | A | G | 0.0565 |
| id:ebi-a-GCST90001953                              |      |         |           |         |             |             |   |   |        |
| CD33 on CD33dim HLA DR-                            | 1558 | 0.0392  | 4.22E-11  | -0.2604 | 19:53262327 | rs11669394  | A | G | 0.3039 |
| id:ebi-a-GCST90001953                              |      |         |           |         |             |             |   |   |        |
| CD33 on CD33dim HLA DR-                            | 1558 | 0.03974 | 2.60E-145 | -1.138  | 19:51727962 | rs3865444   | A | C | 0.1845 |
| id:ebi-a-GCST90001953                              |      |         |           |         |             |             |   |   |        |
| CD33 on CD33dim HLA DR-                            | 1558 | 0.07038 | 4.12E-12  | -0.4918 | 19:51742145 | rs75773078  | A | G | 0.0709 |
| id:ebi-a-GCST90001953                              |      |         |           |         |             |             |   |   |        |
| CD33 on CD33dim HLA DR-                            | 1558 | 0.04579 | 1.22E-13  | 0.3426  | 19:51544665 | rs138712525 | A | G | 0.199  |
| id:ebi-a-GCST90001953                              |      |         |           |         |             |             |   |   |        |
| CD33 on CD33dim HLA DR-                            | 1558 | 0.04209 | 1.15E-17  | -0.3645 | 19:51574038 | rs7351079   | G | A | 0.258  |
| id:ebi-a-GCST90001953                              |      |         |           |         |             |             |   |   |        |
| CD33 on basophil                                   | 1555 | 0.07845 | 6.30E-10  | 0.4881  | 1:247719769 | rs56043070  | A | G | 0.0566 |

---

|                                                      |      |         |           |         |             |             |   |   |        |
|------------------------------------------------------|------|---------|-----------|---------|-------------|-------------|---|---|--------|
| id:ebi-a-GCST90001954                                |      |         |           |         |             |             |   |   |        |
| CD33 on basophil                                     |      |         |           |         |             |             |   |   |        |
| id:ebi-a-GCST90001954                                | 1555 | 0.04576 | 1.26E-13  | 0.3421  | 19:51538952 | rs79377141  | A | G | 0.2006 |
| CD33 on basophil                                     |      |         |           |         |             |             |   |   |        |
| id:ebi-a-GCST90001954                                | 1555 | 0.07051 | 4.53E-12  | -0.4918 | 19:51742145 | rs75773078  | A | G | 0.0707 |
| CD33 on basophil                                     |      |         |           |         |             |             |   |   |        |
| id:ebi-a-GCST90001954                                | 1555 | 0.04217 | 1.40E-17  | -0.3642 | 19:51574038 | rs7351079   | G | A | 0.2579 |
| CD33 on basophil                                     |      |         |           |         |             |             |   |   |        |
| id:ebi-a-GCST90001954                                | 1555 | 0.07238 | 1.33E-12  | 0.5176  | 19:51868443 | rs58483275  | T | C | 0.0733 |
| CD33 on basophil                                     |      |         |           |         |             |             |   |   |        |
| id:ebi-a-GCST90001954                                | 1555 | 0.03861 | 1.81E-150 | -1.131  | 19:51731176 | rs7245846   | A | G | 0.1939 |
| CD33 on basophil                                     |      |         |           |         |             |             |   |   |        |
| id:ebi-a-GCST90001954                                | 1555 | 0.06799 | 2.04E-15  | -0.5454 | 19:51897760 | rs111695695 | A | C | 0.0772 |
| CD33 on Immature Myeloid-Derived<br>Suppressor Cells |      |         |           |         |             |             |   |   |        |
| id:ebi-a-GCST90001955                                | 1554 | 0.0393  | 6.08E-143 | -1.115  | 19:51731176 | rs7245846   | A | G | 0.1934 |
| CD33 on Immature Myeloid-Derived<br>Suppressor Cells |      |         |           |         |             |             |   |   |        |
| id:ebi-a-GCST90001955                                | 1554 | 0.07057 | 1.64E-13  | -0.5252 | 19:51742145 | rs75773078  | A | G | 0.0705 |
| CD33 on Immature Myeloid-Derived<br>Suppressor Cells |      |         |           |         |             |             |   |   |        |
| id:ebi-a-GCST90001955                                | 1554 | 0.0459  | 3.07E-13  | 0.3376  | 19:51538952 | rs79377141  | A | G | 0.2008 |
| CD33 on Immature Myeloid-Derived<br>Suppressor Cells |      |         |           |         |             |             |   |   |        |
| id:ebi-a-GCST90001955                                | 1554 | 0.0424  | 5.07E-15  | -0.3351 | 19:51574038 | rs7351079   | G | A | 0.258  |

---

|                                                                                  |       |           |           |            |             |             |   |   |          |
|----------------------------------------------------------------------------------|-------|-----------|-----------|------------|-------------|-------------|---|---|----------|
| CD33 on Immature Myeloid-Derived<br>Suppressor Cells   <br>id:ebi-a-GCST90001955 | 1554  | 0.06836   | 1.06E-13  | -0.5128    | 19:51897760 | rs111695695 | A | C | 0.0772   |
| CD33 on Immature Myeloid-Derived<br>Suppressor Cells   <br>id:ebi-a-GCST90001955 | 1554  | 0.07256   | 5.21E-12  | 0.5046     | 19:51868443 | rs58483275  | T | C | 0.0734   |
| CD33 on CD33+ HLA DR+   <br>id:ebi-a-GCST90001956                                | 1579  | 0.03627   | 2.81E-187 | -1.219     | 19:51727962 | rs3865444   | A | C | 0.1938   |
| CD33 on CD33+ HLA DR+    id:ebi-a-<br>GCST90001956                               | 1579  | 0.06738   | 1.94E-10  | -0.4318    | 19:52097261 | rs58301181  | G | C | 0.0842   |
| CD33 on CD33+ HLA DR+    id:ebi-a-<br>GCST90001956                               | 1579  | 0.03693   | 3.04E-15  | 0.2943     | 19:51588018 | rs62114147  | T | C | 0.5567   |
| CD33 on CD33+ HLA DR+    id:ebi-a-<br>GCST90001956                               | 1579  | 0.04212   | 2.54E-15  | -0.3366    | 19:51574038 | rs7351079   | G | A | 0.2619   |
| CD33 on CD33+ HLA DR+ CD14-   <br>id:ebi-a-GCST90001957                          | 1578  | 0.03698   | 3.26E-15  | 0.2943     | 19:51588018 | rs62114147  | T | C | 0.557    |
| CD33 on CD33+ HLA DR+ CD14-   <br>id:ebi-a-GCST90001957                          | 1578  | 0.04213   | 1.07E-15  | -0.3413    | 19:51574038 | rs7351079   | G | A | 0.2617   |
| CD33 on CD33+ HLA DR+ CD14-   <br>id:ebi-a-GCST90001957                          | 1578  | 0.0674    | 6.49E-11  | -0.4433    | 19:52097261 | rs58301181  | G | C | 0.0843   |
| CD33 on CD33+ HLA DR+ CD14-   <br>id:ebi-a-GCST90001957                          | 1578  | 0.0362    | 9.18E-189 | -1.223     | 19:51727962 | rs3865444   | A | C | 0.1936   |
| ENSG00000105383   <br>id:eqtl-a-ENSG00000105383                                  | 30077 | 0.0165533 | 1.02E-49  | -0.245385  | 7:50370254  | rs149007767 | T | C | 0.149708 |
| ENSG00000105383   <br>id:eqtl-a-ENSG00000105383                                  | 31569 | 0.0120238 | 9.85E-10  | -0.0734873 | 8:130613614 | rs10098310  | A | G | 0.575007 |

|                                                       |       |           |           |           |             |             |   |   |           |
|-------------------------------------------------------|-------|-----------|-----------|-----------|-------------|-------------|---|---|-----------|
| ENSG00000105383   <br>id:eqtl-a-ENSG00000105383       | 31569 | 0.0118845 | 4.69E-16  | 0.0964906 | 14:23589349 | rs2239630   | G | A | 0.519173  |
| ENSG00000105383   <br>id:eqtl-a-ENSG00000105383       | 25419 | 0.0413475 | 2.47E-130 | -1.00435  | 19:51761614 | rs62115999  | A | G | 0.0203008 |
| ENSG00000105383   <br>id:eqtl-a-ENSG00000105383       | 16223 | 0.0461519 | 4.29E-11  | 0.304316  | 19:51739215 | rs147493755 | C | T | 0.016864  |
| ENSG00000105383   <br>id:eqtl-a-ENSG00000105383       | 31569 | 0.0116707 | 1.00E-200 | 0.363274  | 19:51726911 | rs1710398   | C | A | 0.418566  |
| Myeloid cell surface antigen CD33   <br>id:prot-a-439 | 3301  | 0.0424    | 4.68E-09  | -0.2485   | 19:51575009 | rs62114140  | T | C | 0.10014   |
| Myeloid cell surface antigen CD33   <br>id:prot-a-439 | 3301  | 0.0209    | 1.00E-200 | -0.9436   | 19:51728477 | rs12459419  | T | C | 0.32917   |

EA: effect allele; OA: other allele; eaf: allele frequency of effect allele.

**Supplementary table 3:** Phenoscanner search results of the IVs used in the forward MR analyses(CD33 as exposure, AD as outcome).

| snp       | position       | trait                            | study   | pmid     | ancestry |
|-----------|----------------|----------------------------------|---------|----------|----------|
| rs3865444 | chr19:51727962 | Eosinophil count                 | Astle W | 27863252 | European |
| rs3865444 | chr19:51727962 | Granulocyte count                | Astle W | 27863252 | European |
| rs3865444 | chr19:51727962 | Lymphocyte count                 | Astle W | 27863252 | European |
| rs3865444 | chr19:51727962 | Monocyte count                   | Astle W | 27863252 | European |
| rs3865444 | chr19:51727962 | Myeloid white cell count         | Astle W | 27863252 | European |
| rs3865444 | chr19:51727962 | Platelet count                   | Astle W | 27863252 | European |
| rs3865444 | chr19:51727962 | Plateletcrit                     | Astle W | 27863252 | European |
| rs3865444 | chr19:51727962 | Sum eosinophil basophil counts   | Astle W | 27863252 | European |
| rs3865444 | chr19:51727962 | Sum neutrophil eosinophil counts | Astle W | 27863252 | European |
| rs3865444 | chr19:51727962 | White blood cell count           | Astle W | 27863252 | European |

---

|            |                |                                  |                 |          |          |
|------------|----------------|----------------------------------|-----------------|----------|----------|
| rs3865444  | chr19:51727962 | Alzheimers disease               | Hollingsworth P | 21460840 | European |
| rs3865444  | chr19:51727962 | Late onset Alzheimers disease    | Naj AC          | 21460841 | European |
| rs3865444  | chr19:51727962 | Alzheimers disease               | IGAP            | 24162737 | European |
| rs3865444  | chr19:51727962 | Alzheimers disease late onset    | Naj AC          | 21460841 | European |
| rs3865444  | chr19:51727962 | Alzheimers disease late onset    | IGAP            | 24162737 | European |
| rs3865444  | chr19:51727962 | Platelet count                   | Astle W         | 27863252 | European |
| rs3865444  | chr19:51727962 | White blood cell count           | Astle W         | 27863252 | European |
| rs3865444  | chr19:51727962 | Alzheimer disease                | Naj AC          | 21460841 | European |
| rs58483275 | chr19:51868443 | Myositis                         | Neale B         | UKBB     | European |
| rs3865444  | chr19:51727962 | Eosinophil count                 | Astle W         | 27863252 | European |
| rs3865444  | chr19:51727962 | Granulocyte count                | Astle W         | 27863252 | European |
| rs3865444  | chr19:51727962 | Lymphocyte count                 | Astle W         | 27863252 | European |
| rs3865444  | chr19:51727962 | Monocyte count                   | Astle W         | 27863252 | European |
| rs3865444  | chr19:51727962 | Myeloid white cell count         | Astle W         | 27863252 | European |
| rs3865444  | chr19:51727962 | Platelet count                   | Astle W         | 27863252 | European |
| rs3865444  | chr19:51727962 | Plateletcrit                     | Astle W         | 27863252 | European |
| rs3865444  | chr19:51727962 | Sum eosinophil basophil counts   | Astle W         | 27863252 | European |
| rs3865444  | chr19:51727962 | Sum neutrophil eosinophil counts | Astle W         | 27863252 | European |
| rs3865444  | chr19:51727962 | White blood cell count           | Astle W         | 27863252 | European |
| rs3865444  | chr19:51727962 | Alzheimers disease               | Hollingsworth P | 21460840 | European |
| rs3865444  | chr19:51727962 | Late onset Alzheimers disease    | Naj AC          | 21460841 | European |
| rs3865444  | chr19:51727962 | Alzheimers disease               | IGAP            | 24162737 | European |
| rs3865444  | chr19:51727962 | Alzheimers disease late onset    | Naj AC          | 21460841 | European |
| rs3865444  | chr19:51727962 | Alzheimers disease late onset    | IGAP            | 24162737 | European |
| rs3865444  | chr19:51727962 | Platelet count                   | Astle W         | 27863252 | European |

---

---

|           |                |                                          |              |          |            |
|-----------|----------------|------------------------------------------|--------------|----------|------------|
| rs3865444 | chr19:51727962 | White blood cell count                   | Astle W      | 27863252 | European   |
| rs3865444 | chr19:51727962 | Alzheimer disease                        | Naj AC       | 21460841 | European   |
| rs1801274 | chr1:161479745 | Basophil count                           | Astle W      | 27863252 | European   |
| rs1801274 | chr1:161479745 | Basophil percentage of granulocytes      | Astle W      | 27863252 | European   |
| rs1801274 | chr1:161479745 | Basophil percentage of white cells       | Astle W      | 27863252 | European   |
| rs1801274 | chr1:161479745 | Inflammatory bowel disease               | IBDGC        | 23128233 | European   |
| rs1801274 | chr1:161479745 | Kawasaki disease                         | Khor CC      | 22081228 | Mixed      |
| rs1801274 | chr1:161479745 | Kawasaki disease                         | Onouchi Y    | 22446962 | East Asian |
| rs1801274 | chr1:161479745 | Systemic lupus erythematosus SLE females | Harley JB    | 18204446 | European   |
| rs1801274 | chr1:161479745 | Total cholesterol                        | Asselbergs   | 23063622 | European   |
| rs1801274 | chr1:161479745 | Total colectomy in ulcerative colitis    | Asano K      | 19915573 | East Asian |
| rs1801274 | chr1:161479745 | Ulcerative colitis                       | Asano K      | 19915573 | East Asian |
| rs1801274 | chr1:161479745 | Ulcerative colitis                       | Anderson CA  | 21297633 | European   |
| rs1801274 | chr1:161479745 | Ulcerative colitis Smoking               | Asano K      | 19915573 | East Asian |
| rs1801274 | chr1:161479745 | Inflammatory bowel disease               | IBDGC        | 26192919 | European   |
| rs1801274 | chr1:161479745 | Ulcerative colitis                       | IBDGC        | 23128233 | European   |
| rs1801274 | chr1:161479745 | Ulcerative colitis                       | IBDGC        | 26192919 | European   |
| rs1801274 | chr1:161479745 | Cerebrospinal fluid biomarker levels     | Sasayama D   | 28031287 | East Asian |
| rs1801274 | chr1:161479745 | Crohns disease                           | IBDGC        | 26192919 | European   |
| rs1801274 | chr1:161479745 | Inflammatory bowel disease               | IBDGC        | 23128233 | European   |
| rs1801274 | chr1:161479745 | Inflammatory bowel disease               | IBDGC        | 26192919 | European   |
| rs1801274 | chr1:161479745 | Inflammatory bowel disease               | de Lange KM  | 28067908 | Mixed      |
| rs1801274 | chr1:161479745 | Kawasaki disease                         | Khor CC      | 22081228 | Mixed      |
| rs1801274 | chr1:161479745 | Kawasaki disease                         | Kwon YC      | 28886140 | East Asian |
| rs1801274 | chr1:161479745 | Systemic lupus erythematosus             | Armstrong DL | 24871463 | European   |

---

|           |                |                                                             |             |          |            |
|-----------|----------------|-------------------------------------------------------------|-------------|----------|------------|
| rs1801274 | chr1:161479745 | Systemic lupus erythematosus                                | Bentham J   | 26502338 | European   |
| rs1801274 | chr1:161479745 | Systemic lupus erythematosus                                | Lessard CJ  | 26663301 | East Asian |
| rs1801274 | chr1:161479745 | Systemic lupus erythematosus                                | Morris DL   | 27399966 | Mixed      |
| rs1801274 | chr1:161479745 | Ulcerative colitis                                          | Asano K     | 19915573 | East Asian |
| rs1801274 | chr1:161479745 | Ulcerative colitis                                          | Anderson CA | 21297633 | European   |
| rs1801274 | chr1:161479745 | Ulcerative colitis                                          | IBDGC       | 26192919 | European   |
| rs1801274 | chr1:161479745 | Ulcerative colitis                                          | de Lange KM | 28067908 | Mixed      |
| rs1801274 | chr1:161479745 | Parkinsons disease                                          | Nalls M     | 25064009 | European   |
| rs1801274 | chr1:161479745 | Self-reported ulcerative colitis                            | Neale B     | UKBB     | European   |
| rs1801274 | chr1:161479745 | Rheumatoid arthritis                                        | Okada Y     | 24390342 | European   |
| rs1801274 | chr1:161479745 | Rheumatoid arthritis                                        | Okada Y     | 24390342 | Mixed      |
| rs1801274 | chr1:161479745 | 1c+mDC:%32+; CD1c+ mDC subset (CD32+)                       | Roederer M  | 25772697 | European   |
| rs1801274 | chr1:161479745 | CD161 on CD4mem; Memory CD4                                 | Roederer M  | 25772697 | European   |
| rs1801274 | chr1:161479745 | CD27 on CD4 T; CD4 T                                        | Roederer M  | 25772697 | European   |
| rs1801274 | chr1:161479745 | CD27 on CD8 T; CD8 T                                        | Roederer M  | 25772697 | European   |
| rs1801274 | chr1:161479745 | CD27 on IgA+B; IgA+ B                                       | Roederer M  | 25772697 | European   |
| rs1801274 | chr1:161479745 | CD27 on IgG+B; IgG+ B                                       | Roederer M  | 25772697 | European   |
| rs1801274 | chr1:161479745 | CD32 on pDC; pDC                                            | Roederer M  | 25772697 | European   |
| rs1801274 | chr1:161479745 | CD4mem:%preTh17 (1); pre-Th17<br>(CD161+PD1+CCR4+CXCR3-)    | Roederer M  | 25772697 | European   |
| rs1801274 | chr1:161479745 | CD8:%TM-like; CD8 TM-like (CD27-CD28+CD127+CD244-<br>CDRA+) | Roederer M  | 25772697 | European   |
| rs1801274 | chr1:161479745 | PD1 on CD4mem; Memory CD4                                   | Roederer M  | 25772697 | European   |
| rs1801274 | chr1:161479745 | mDC:%32+; mDC subset (CD32+)                                | Roederer M  | 25772697 | European   |
| rs1801274 | chr1:161479745 | Colitis ulcerative                                          | Asano K     | 19915573 | East Asian |

|            |                |                                     |                |          |          |
|------------|----------------|-------------------------------------|----------------|----------|----------|
| rs1801274  | chr1:161479745 | Colitis ulcerative                  | Anderson CA    | 21297633 | European |
| rs1801274  | chr1:161479745 | Mucocutaneous lymph node syndrome   | Khor CC        | 22081228 | Mixed    |
| rs58483275 | chr19:51868443 | Myositis                            | Neale B        | UKBB     | European |
| rs3865444  | chr19:51727962 | Eosinophil count                    | Astle W        | 27863252 | European |
| rs3865444  | chr19:51727962 | Granulocyte count                   | Astle W        | 27863252 | European |
| rs3865444  | chr19:51727962 | Lymphocyte count                    | Astle W        | 27863252 | European |
| rs3865444  | chr19:51727962 | Monocyte count                      | Astle W        | 27863252 | European |
| rs3865444  | chr19:51727962 | Myeloid white cell count            | Astle W        | 27863252 | European |
| rs3865444  | chr19:51727962 | Platelet count                      | Astle W        | 27863252 | European |
| rs3865444  | chr19:51727962 | Plateletcrit                        | Astle W        | 27863252 | European |
| rs3865444  | chr19:51727962 | Sum eosinophil basophil counts      | Astle W        | 27863252 | European |
| rs3865444  | chr19:51727962 | Sum neutrophil eosinophil counts    | Astle W        | 27863252 | European |
| rs3865444  | chr19:51727962 | White blood cell count              | Astle W        | 27863252 | European |
| rs3865444  | chr19:51727962 | Alzheimers disease                  | Hollingworth P | 21460840 | European |
| rs3865444  | chr19:51727962 | Late onset Alzheimers disease       | Naj AC         | 21460841 | European |
| rs3865444  | chr19:51727962 | Alzheimers disease                  | IGAP           | 24162737 | European |
| rs3865444  | chr19:51727962 | Alzheimers disease late onset       | Naj AC         | 21460841 | European |
| rs3865444  | chr19:51727962 | Alzheimers disease late onset       | IGAP           | 24162737 | European |
| rs3865444  | chr19:51727962 | Platelet count                      | Astle W        | 27863252 | European |
| rs3865444  | chr19:51727962 | White blood cell count              | Astle W        | 27863252 | European |
| rs3865444  | chr19:51727962 | Alzheimer disease                   | Naj AC         | 21460841 | European |
| rs1801274  | chr1:161479745 | Basophil count                      | Astle W        | 27863252 | European |
| rs1801274  | chr1:161479745 | Basophil percentage of granulocytes | Astle W        | 27863252 | European |
| rs1801274  | chr1:161479745 | Basophil percentage of white cells  | Astle W        | 27863252 | European |
| rs1801274  | chr1:161479745 | Inflammatory bowel disease          | IBDGC          | 23128233 | European |

|           |                |                                          |              |          |            |
|-----------|----------------|------------------------------------------|--------------|----------|------------|
| rs1801274 | chr1:161479745 | Kawasaki disease                         | Khor CC      | 22081228 | Mixed      |
| rs1801274 | chr1:161479745 | Kawasaki disease                         | Onouchi Y    | 22446962 | East Asian |
| rs1801274 | chr1:161479745 | Systemic lupus erythematosus SLE females | Harley JB    | 18204446 | European   |
| rs1801274 | chr1:161479745 | Total cholesterol                        | Asselbergs   | 23063622 | European   |
| rs1801274 | chr1:161479745 | Total colectomy in ulcerative colitis    | Asano K      | 19915573 | East Asian |
| rs1801274 | chr1:161479745 | Ulcerative colitis                       | Asano K      | 19915573 | East Asian |
| rs1801274 | chr1:161479745 | Ulcerative colitis                       | Anderson CA  | 21297633 | European   |
| rs1801274 | chr1:161479745 | Ulcerative colitis Smoking               | Asano K      | 19915573 | East Asian |
| rs1801274 | chr1:161479745 | Inflammatory bowel disease               | IBDGC        | 26192919 | European   |
| rs1801274 | chr1:161479745 | Ulcerative colitis                       | IBDGC        | 23128233 | European   |
| rs1801274 | chr1:161479745 | Ulcerative colitis                       | IBDGC        | 26192919 | European   |
| rs1801274 | chr1:161479745 | Cerebrospinal fluid biomarker levels     | Sasayama D   | 28031287 | East Asian |
| rs1801274 | chr1:161479745 | Crohns disease                           | IBDGC        | 26192919 | European   |
| rs1801274 | chr1:161479745 | Inflammatory bowel disease               | IBDGC        | 23128233 | European   |
| rs1801274 | chr1:161479745 | Inflammatory bowel disease               | IBDGC        | 26192919 | European   |
| rs1801274 | chr1:161479745 | Inflammatory bowel disease               | de Lange KM  | 28067908 | Mixed      |
| rs1801274 | chr1:161479745 | Kawasaki disease                         | Khor CC      | 22081228 | Mixed      |
| rs1801274 | chr1:161479745 | Kawasaki disease                         | Kwon YC      | 28886140 | East Asian |
| rs1801274 | chr1:161479745 | Systemic lupus erythematosus             | Armstrong DL | 24871463 | European   |
| rs1801274 | chr1:161479745 | Systemic lupus erythematosus             | Bentham J    | 26502338 | European   |
| rs1801274 | chr1:161479745 | Systemic lupus erythematosus             | Lessard CJ   | 26663301 | East Asian |
| rs1801274 | chr1:161479745 | Systemic lupus erythematosus             | Morris DL    | 27399966 | Mixed      |
| rs1801274 | chr1:161479745 | Ulcerative colitis                       | Asano K      | 19915573 | East Asian |
| rs1801274 | chr1:161479745 | Ulcerative colitis                       | Anderson CA  | 21297633 | European   |
| rs1801274 | chr1:161479745 | Ulcerative colitis                       | IBDGC        | 26192919 | European   |

|           |                |                                                             |             |          |            |
|-----------|----------------|-------------------------------------------------------------|-------------|----------|------------|
| rs1801274 | chr1:161479745 | Ulcerative colitis                                          | de Lange KM | 28067908 | Mixed      |
| rs1801274 | chr1:161479745 | Parkinsons disease                                          | Nalls M     | 25064009 | European   |
| rs1801274 | chr1:161479745 | Self-reported ulcerative colitis                            | Neale B     | UKBB     | European   |
| rs1801274 | chr1:161479745 | Rheumatoid arthritis                                        | Okada Y     | 24390342 | European   |
| rs1801274 | chr1:161479745 | Rheumatoid arthritis                                        | Okada Y     | 24390342 | Mixed      |
| rs1801274 | chr1:161479745 | 1c+mDC:%32+; CD1c+ mDC subset (CD32+)                       | Roederer M  | 25772697 | European   |
| rs1801274 | chr1:161479745 | CD161 on CD4mem; Memory CD4                                 | Roederer M  | 25772697 | European   |
| rs1801274 | chr1:161479745 | CD27 on CD4 T; CD4 T                                        | Roederer M  | 25772697 | European   |
| rs1801274 | chr1:161479745 | CD27 on CD8 T; CD8 T                                        | Roederer M  | 25772697 | European   |
| rs1801274 | chr1:161479745 | CD27 on IgA+B; IgA+ B                                       | Roederer M  | 25772697 | European   |
| rs1801274 | chr1:161479745 | CD27 on IgG+B; IgG+ B                                       | Roederer M  | 25772697 | European   |
| rs1801274 | chr1:161479745 | CD32 on pDC; pDC                                            | Roederer M  | 25772697 | European   |
| rs1801274 | chr1:161479745 | CD4mem:%preTh17 (1); pre-Th17<br>(CD161+PD1+CCR4+CXCR3-)    | Roederer M  | 25772697 | European   |
| rs1801274 | chr1:161479745 | CD8:%TM-like; CD8 TM-like (CD27-CD28+CD127+CD244-<br>CDRA+) | Roederer M  | 25772697 | European   |
| rs1801274 | chr1:161479745 | PD1 on CD4mem; Memory CD4                                   | Roederer M  | 25772697 | European   |
| rs1801274 | chr1:161479745 | mDC:%32+; mDC subset (CD32+)                                | Roederer M  | 25772697 | European   |
| rs1801274 | chr1:161479745 | Colitis ulcerative                                          | Asano K     | 19915573 | East Asian |
| rs1801274 | chr1:161479745 | Colitis ulcerative                                          | Anderson CA | 21297633 | European   |
| rs1801274 | chr1:161479745 | Mucocutaneous lymph node syndrome                           | Khor CC     | 22081228 | Mixed      |
| rs3865444 | chr19:51727962 | Eosinophil count                                            | Astle W     | 27863252 | European   |
| rs3865444 | chr19:51727962 | Granulocyte count                                           | Astle W     | 27863252 | European   |
| rs3865444 | chr19:51727962 | Lymphocyte count                                            | Astle W     | 27863252 | European   |
| rs3865444 | chr19:51727962 | Monocyte count                                              | Astle W     | 27863252 | European   |

|           |                |                                  |                |          |          |
|-----------|----------------|----------------------------------|----------------|----------|----------|
| rs3865444 | chr19:51727962 | Myeloid white cell count         | Astle W        | 27863252 | European |
| rs3865444 | chr19:51727962 | Platelet count                   | Astle W        | 27863252 | European |
| rs3865444 | chr19:51727962 | Plateletcrit                     | Astle W        | 27863252 | European |
| rs3865444 | chr19:51727962 | Sum eosinophil basophil counts   | Astle W        | 27863252 | European |
| rs3865444 | chr19:51727962 | Sum neutrophil eosinophil counts | Astle W        | 27863252 | European |
| rs3865444 | chr19:51727962 | White blood cell count           | Astle W        | 27863252 | European |
| rs3865444 | chr19:51727962 | Alzheimers disease               | Hollingworth P | 21460840 | European |
| rs3865444 | chr19:51727962 | Late onset Alzheimers disease    | Naj AC         | 21460841 | European |
| rs3865444 | chr19:51727962 | Alzheimers disease               | IGAP           | 24162737 | European |
| rs3865444 | chr19:51727962 | Alzheimers disease late onset    | Naj AC         | 21460841 | European |
| rs3865444 | chr19:51727962 | Alzheimers disease late onset    | IGAP           | 24162737 | European |
| rs3865444 | chr19:51727962 | Platelet count                   | Astle W        | 27863252 | European |
| rs3865444 | chr19:51727962 | White blood cell count           | Astle W        | 27863252 | European |
| rs3865444 | chr19:51727962 | Alzheimer disease                | Naj AC         | 21460841 | European |
| rs7245846 | chr19:51731176 | Lymphocyte count                 | Astle W        | 27863252 | European |
| rs7245846 | chr19:51731176 | Platelet count                   | Astle W        | 27863252 | European |
| rs7245846 | chr19:51731176 | Plateletcrit                     | Astle W        | 27863252 | European |
| rs7245846 | chr19:51731176 | White blood cell count           | Astle W        | 27863252 | European |
| rs7245846 | chr19:51731176 | Alzheimers disease               | IGAP           | 24162737 | European |
| rs3865444 | chr19:51727962 | Eosinophil count                 | Astle W        | 27863252 | European |
| rs3865444 | chr19:51727962 | Granulocyte count                | Astle W        | 27863252 | European |
| rs3865444 | chr19:51727962 | Lymphocyte count                 | Astle W        | 27863252 | European |
| rs3865444 | chr19:51727962 | Monocyte count                   | Astle W        | 27863252 | European |
| rs3865444 | chr19:51727962 | Myeloid white cell count         | Astle W        | 27863252 | European |
| rs3865444 | chr19:51727962 | Platelet count                   | Astle W        | 27863252 | European |

|           |                |                                  |                |          |          |
|-----------|----------------|----------------------------------|----------------|----------|----------|
| rs3865444 | chr19:51727962 | Plateletcrit                     | Astle W        | 27863252 | European |
| rs3865444 | chr19:51727962 | Sum eosinophil basophil counts   | Astle W        | 27863252 | European |
| rs3865444 | chr19:51727962 | Sum neutrophil eosinophil counts | Astle W        | 27863252 | European |
| rs3865444 | chr19:51727962 | White blood cell count           | Astle W        | 27863252 | European |
| rs3865444 | chr19:51727962 | Alzheimers disease               | Hollingworth P | 21460840 | European |
| rs3865444 | chr19:51727962 | Late onset Alzheimers disease    | Naj AC         | 21460841 | European |
| rs3865444 | chr19:51727962 | Alzheimers disease               | IGAP           | 24162737 | European |
| rs3865444 | chr19:51727962 | Alzheimers disease late onset    | Naj AC         | 21460841 | European |
| rs3865444 | chr19:51727962 | Alzheimers disease late onset    | IGAP           | 24162737 | European |
| rs3865444 | chr19:51727962 | Platelet count                   | Astle W        | 27863252 | European |
| rs3865444 | chr19:51727962 | White blood cell count           | Astle W        | 27863252 | European |
| rs3865444 | chr19:51727962 | Alzheimer disease                | Naj AC         | 21460841 | European |
| rs3865444 | chr19:51727962 | Eosinophil count                 | Astle W        | 27863252 | European |
| rs3865444 | chr19:51727962 | Granulocyte count                | Astle W        | 27863252 | European |
| rs3865444 | chr19:51727962 | Lymphocyte count                 | Astle W        | 27863252 | European |
| rs3865444 | chr19:51727962 | Monocyte count                   | Astle W        | 27863252 | European |
| rs3865444 | chr19:51727962 | Myeloid white cell count         | Astle W        | 27863252 | European |
| rs3865444 | chr19:51727962 | Platelet count                   | Astle W        | 27863252 | European |
| rs3865444 | chr19:51727962 | Plateletcrit                     | Astle W        | 27863252 | European |
| rs3865444 | chr19:51727962 | Sum eosinophil basophil counts   | Astle W        | 27863252 | European |
| rs3865444 | chr19:51727962 | Sum neutrophil eosinophil counts | Astle W        | 27863252 | European |
| rs3865444 | chr19:51727962 | White blood cell count           | Astle W        | 27863252 | European |
| rs3865444 | chr19:51727962 | Alzheimers disease               | Hollingworth P | 21460840 | European |
| rs3865444 | chr19:51727962 | Late onset Alzheimers disease    | Naj AC         | 21460841 | European |
| rs3865444 | chr19:51727962 | Alzheimers disease               | IGAP           | 24162737 | European |

|            |                |                                            |         |          |          |
|------------|----------------|--------------------------------------------|---------|----------|----------|
| rs3865444  | chr19:51727962 | Alzheimers disease late onset              | Naj AC  | 21460841 | European |
| rs3865444  | chr19:51727962 | Alzheimers disease late onset              | IGAP    | 24162737 | European |
| rs3865444  | chr19:51727962 | Platelet count                             | Astle W | 27863252 | European |
| rs3865444  | chr19:51727962 | White blood cell count                     | Astle W | 27863252 | European |
| rs3865444  | chr19:51727962 | Alzheimer disease                          | Naj AC  | 21460841 | European |
| rs56043070 | chr1:247719769 | High light scatter percentage of red cells | Astle W | 27863252 | European |
| rs56043070 | chr1:247719769 | High light scatter reticulocyte count      | Astle W | 27863252 | European |
| rs56043070 | chr1:247719769 | Lymphocyte count                           | Astle W | 27863252 | European |
| rs56043070 | chr1:247719769 | Mean corpuscular volume                    | Astle W | 27863252 | European |
| rs56043070 | chr1:247719769 | Mean platelet volume                       | Astle W | 27863252 | European |
| rs56043070 | chr1:247719769 | Platelet count                             | Astle W | 27863252 | European |
| rs56043070 | chr1:247719769 | Platelet distribution width                | Astle W | 27863252 | European |
| rs56043070 | chr1:247719769 | Plateletcrit                               | Astle W | 27863252 | European |
| rs56043070 | chr1:247719769 | Reticulocyte count                         | Astle W | 27863252 | European |
| rs56043070 | chr1:247719769 | Reticulocyte fraction of red cells         | Astle W | 27863252 | European |
| rs56043070 | chr1:247719769 | Mean platelet volume                       | Astle W | 27863252 | European |
| rs56043070 | chr1:247719769 | Platelet count                             | Astle W | 27863252 | European |
| rs56043070 | chr1:247719769 | Platelet distribution width                | Astle W | 27863252 | European |
| rs56043070 | chr1:247719769 | Plateletcrit                               | Astle W | 27863252 | European |
| rs56043070 | chr1:247719769 | Reticulocyte count                         | Astle W | 27863252 | European |
| rs56043070 | chr1:247719769 | Reticulocyte fraction of red cells         | Astle W | 27863252 | European |
| rs3865444  | chr19:51727962 | Eosinophil count                           | Astle W | 27863252 | European |
| rs3865444  | chr19:51727962 | Granulocyte count                          | Astle W | 27863252 | European |
| rs3865444  | chr19:51727962 | Lymphocyte count                           | Astle W | 27863252 | European |
| rs3865444  | chr19:51727962 | Monocyte count                             | Astle W | 27863252 | European |

|            |                |                                            |                |          |          |
|------------|----------------|--------------------------------------------|----------------|----------|----------|
| rs3865444  | chr19:51727962 | Myeloid white cell count                   | Astle W        | 27863252 | European |
| rs3865444  | chr19:51727962 | Platelet count                             | Astle W        | 27863252 | European |
| rs3865444  | chr19:51727962 | Plateletcrit                               | Astle W        | 27863252 | European |
| rs3865444  | chr19:51727962 | Sum eosinophil basophil counts             | Astle W        | 27863252 | European |
| rs3865444  | chr19:51727962 | Sum neutrophil eosinophil counts           | Astle W        | 27863252 | European |
| rs3865444  | chr19:51727962 | White blood cell count                     | Astle W        | 27863252 | European |
| rs3865444  | chr19:51727962 | Alzheimers disease                         | Hollingworth P | 21460840 | European |
| rs3865444  | chr19:51727962 | Late onset Alzheimers disease              | Naj AC         | 21460841 | European |
| rs3865444  | chr19:51727962 | Alzheimers disease                         | IGAP           | 24162737 | European |
| rs3865444  | chr19:51727962 | Alzheimers disease late onset              | Naj AC         | 21460841 | European |
| rs3865444  | chr19:51727962 | Alzheimers disease late onset              | IGAP           | 24162737 | European |
| rs3865444  | chr19:51727962 | Platelet count                             | Astle W        | 27863252 | European |
| rs3865444  | chr19:51727962 | White blood cell count                     | Astle W        | 27863252 | European |
| rs3865444  | chr19:51727962 | Alzheimer disease                          | Naj AC         | 21460841 | European |
| rs56043070 | chr1:247719769 | High light scatter percentage of red cells | Astle W        | 27863252 | European |
| rs56043070 | chr1:247719769 | High light scatter reticulocyte count      | Astle W        | 27863252 | European |
| rs56043070 | chr1:247719769 | Lymphocyte count                           | Astle W        | 27863252 | European |
| rs56043070 | chr1:247719769 | Mean corpuscular volume                    | Astle W        | 27863252 | European |
| rs56043070 | chr1:247719769 | Mean platelet volume                       | Astle W        | 27863252 | European |
| rs56043070 | chr1:247719769 | Platelet count                             | Astle W        | 27863252 | European |
| rs56043070 | chr1:247719769 | Platelet distribution width                | Astle W        | 27863252 | European |
| rs56043070 | chr1:247719769 | Plateletcrit                               | Astle W        | 27863252 | European |
| rs56043070 | chr1:247719769 | Reticulocyte count                         | Astle W        | 27863252 | European |
| rs56043070 | chr1:247719769 | Reticulocyte fraction of red cells         | Astle W        | 27863252 | European |
| rs56043070 | chr1:247719769 | Mean platelet volume                       | Astle W        | 27863252 | European |

|            |                |                                    |         |          |          |
|------------|----------------|------------------------------------|---------|----------|----------|
| rs56043070 | chr1:247719769 | Platelet count                     | Astle W | 27863252 | European |
| rs56043070 | chr1:247719769 | Platelet distribution width        | Astle W | 27863252 | European |
| rs56043070 | chr1:247719769 | Plateletcrit                       | Astle W | 27863252 | European |
| rs56043070 | chr1:247719769 | Reticulocyte count                 | Astle W | 27863252 | European |
| rs56043070 | chr1:247719769 | Reticulocyte fraction of red cells | Astle W | 27863252 | European |
| rs58483275 | chr19:51868443 | Myositis                           | Neale B | UKBB     | European |
| rs7245846  | chr19:51731176 | Lymphocyte count                   | Astle W | 27863252 | European |
| rs7245846  | chr19:51731176 | Platelet count                     | Astle W | 27863252 | European |
| rs7245846  | chr19:51731176 | Plateletcrit                       | Astle W | 27863252 | European |
| rs7245846  | chr19:51731176 | White blood cell count             | Astle W | 27863252 | European |
| rs7245846  | chr19:51731176 | Alzheimers disease                 | IGAP    | 24162737 | European |
| rs7245846  | chr19:51731176 | Lymphocyte count                   | Astle W | 27863252 | European |
| rs7245846  | chr19:51731176 | Platelet count                     | Astle W | 27863252 | European |
| rs7245846  | chr19:51731176 | Plateletcrit                       | Astle W | 27863252 | European |
| rs7245846  | chr19:51731176 | White blood cell count             | Astle W | 27863252 | European |
| rs7245846  | chr19:51731176 | Alzheimers disease                 | IGAP    | 24162737 | European |
| rs58483275 | chr19:51868443 | Myositis                           | Neale B | UKBB     | European |
| rs3865444  | chr19:51727962 | Eosinophil count                   | Astle W | 27863252 | European |
| rs3865444  | chr19:51727962 | Granulocyte count                  | Astle W | 27863252 | European |
| rs3865444  | chr19:51727962 | Lymphocyte count                   | Astle W | 27863252 | European |
| rs3865444  | chr19:51727962 | Monocyte count                     | Astle W | 27863252 | European |
| rs3865444  | chr19:51727962 | Myeloid white cell count           | Astle W | 27863252 | European |
| rs3865444  | chr19:51727962 | Platelet count                     | Astle W | 27863252 | European |
| rs3865444  | chr19:51727962 | Plateletcrit                       | Astle W | 27863252 | European |
| rs3865444  | chr19:51727962 | Sum eosinophil basophil counts     | Astle W | 27863252 | European |

|           |                |                                  |                |          |          |
|-----------|----------------|----------------------------------|----------------|----------|----------|
| rs3865444 | chr19:51727962 | Sum neutrophil eosinophil counts | Astle W        | 27863252 | European |
| rs3865444 | chr19:51727962 | White blood cell count           | Astle W        | 27863252 | European |
| rs3865444 | chr19:51727962 | Alzheimers disease               | Hollingworth P | 21460840 | European |
| rs3865444 | chr19:51727962 | Late onset Alzheimers disease    | Naj AC         | 21460841 | European |
| rs3865444 | chr19:51727962 | Alzheimers disease               | IGAP           | 24162737 | European |
| rs3865444 | chr19:51727962 | Alzheimers disease late onset    | Naj AC         | 21460841 | European |
| rs3865444 | chr19:51727962 | Alzheimers disease late onset    | IGAP           | 24162737 | European |
| rs3865444 | chr19:51727962 | Platelet count                   | Astle W        | 27863252 | European |
| rs3865444 | chr19:51727962 | White blood cell count           | Astle W        | 27863252 | European |
| rs3865444 | chr19:51727962 | Alzheimer disease                | Naj AC         | 21460841 | European |
| rs3865444 | chr19:51727962 | Eosinophil count                 | Astle W        | 27863252 | European |
| rs3865444 | chr19:51727962 | Granulocyte count                | Astle W        | 27863252 | European |
| rs3865444 | chr19:51727962 | Lymphocyte count                 | Astle W        | 27863252 | European |
| rs3865444 | chr19:51727962 | Monocyte count                   | Astle W        | 27863252 | European |
| rs3865444 | chr19:51727962 | Myeloid white cell count         | Astle W        | 27863252 | European |
| rs3865444 | chr19:51727962 | Platelet count                   | Astle W        | 27863252 | European |
| rs3865444 | chr19:51727962 | Plateletcrit                     | Astle W        | 27863252 | European |
| rs3865444 | chr19:51727962 | Sum eosinophil basophil counts   | Astle W        | 27863252 | European |
| rs3865444 | chr19:51727962 | Sum neutrophil eosinophil counts | Astle W        | 27863252 | European |
| rs3865444 | chr19:51727962 | White blood cell count           | Astle W        | 27863252 | European |
| rs3865444 | chr19:51727962 | Alzheimers disease               | Hollingworth P | 21460840 | European |
| rs3865444 | chr19:51727962 | Late onset Alzheimers disease    | Naj AC         | 21460841 | European |
| rs3865444 | chr19:51727962 | Alzheimers disease               | IGAP           | 24162737 | European |
| rs3865444 | chr19:51727962 | Alzheimers disease late onset    | Naj AC         | 21460841 | European |
| rs3865444 | chr19:51727962 | Alzheimers disease late onset    | IGAP           | 24162737 | European |

|             |                |                                               |         |          |          |
|-------------|----------------|-----------------------------------------------|---------|----------|----------|
| rs3865444   | chr19:51727962 | Platelet count                                | Astle W | 27863252 | European |
| rs3865444   | chr19:51727962 | White blood cell count                        | Astle W | 27863252 | European |
| rs3865444   | chr19:51727962 | Alzheimer disease                             | Naj AC  | 21460841 | European |
| rs149007767 | chr7:50370254  | Basophil count                                | Astle W | 27863252 | European |
| rs149007767 | chr7:50370254  | Basophil percentage of white cells            | Astle W | 27863252 | European |
| rs149007767 | chr7:50370254  | Granulocyte percentage of myeloid white cells | Astle W | 27863252 | European |
| rs149007767 | chr7:50370254  | Monocyte count                                | Astle W | 27863252 | European |
| rs149007767 | chr7:50370254  | Monocyte percentage of white cells            | Astle W | 27863252 | European |
| rs149007767 | chr7:50370254  | Neutrophil percentage of white cells          | Astle W | 27863252 | European |
| rs149007767 | chr7:50370254  | Granulocyte percentage of myeloid white cells | Astle W | 27863252 | European |
| rs149007767 | chr7:50370254  | Monocyte count                                | Astle W | 27863252 | European |
| rs149007767 | chr7:50370254  | Monocyte percentage of white cells            | Astle W | 27863252 | European |
| rs149007767 | chr7:50370254  | Neutrophil percentage of white cells          | Astle W | 27863252 | European |
| rs10098310  | chr8:130613614 | Basophil percentage of granulocytes           | Astle W | 27863252 | European |
| rs10098310  | chr8:130613614 | Basophil percentage of white cells            | Astle W | 27863252 | European |
| rs10098310  | chr8:130613614 | Eosinophil count                              | Astle W | 27863252 | European |
| rs10098310  | chr8:130613614 | Eosinophil percentage of granulocytes         | Astle W | 27863252 | European |
| rs10098310  | chr8:130613614 | Eosinophil percentage of white cells          | Astle W | 27863252 | European |
| rs10098310  | chr8:130613614 | Granulocyte count                             | Astle W | 27863252 | European |
| rs10098310  | chr8:130613614 | Granulocyte percentage of myeloid white cells | Astle W | 27863252 | European |
| rs10098310  | chr8:130613614 | Immature fraction of reticulocytes            | Astle W | 27863252 | European |
| rs10098310  | chr8:130613614 | Lymphocyte percentage of white cells          | Astle W | 27863252 | European |
| rs10098310  | chr8:130613614 | Mean corpuscular hemoglobin                   | Astle W | 27863252 | European |
| rs10098310  | chr8:130613614 | Mean corpuscular volume                       | Astle W | 27863252 | European |
| rs10098310  | chr8:130613614 | Monocyte count                                | Astle W | 27863252 | European |

---

|            |                |                                               |          |          |          |
|------------|----------------|-----------------------------------------------|----------|----------|----------|
| rs10098310 | chr8:130613614 | Monocyte percentage of white cells            | Astle W  | 27863252 | European |
| rs10098310 | chr8:130613614 | Myeloid white cell count                      | Astle W  | 27863252 | European |
| rs10098310 | chr8:130613614 | Neutrophil count                              | Astle W  | 27863252 | European |
| rs10098310 | chr8:130613614 | Neutrophil percentage of granulocytes         | Astle W  | 27863252 | European |
| rs10098310 | chr8:130613614 | Neutrophil percentage of white cells          | Astle W  | 27863252 | European |
| rs10098310 | chr8:130613614 | Red blood cell count                          | Astle W  | 27863252 | European |
| rs10098310 | chr8:130613614 | Sum basophil neutrophil counts                | Astle W  | 27863252 | European |
| rs10098310 | chr8:130613614 | Sum eosinophil basophil counts                | Astle W  | 27863252 | European |
| rs10098310 | chr8:130613614 | Sum neutrophil eosinophil counts              | Astle W  | 27863252 | European |
| rs10098310 | chr8:130613614 | White blood cell count                        | Astle W  | 27863252 | European |
| rs10098310 | chr8:130613614 | Inflammatory bowel disease                    | IBDGC    | 26192919 | European |
| rs10098310 | chr8:130613614 | White blood cell count                        | Nalls MA | 21738480 | European |
| rs2239630  | chr14:23589349 | Basophil count                                | Astle W  | 27863252 | European |
| rs2239630  | chr14:23589349 | Basophil percentage of granulocytes           | Astle W  | 27863252 | European |
| rs2239630  | chr14:23589349 | Basophil percentage of white cells            | Astle W  | 27863252 | European |
| rs2239630  | chr14:23589349 | Eosinophil count                              | Astle W  | 27863252 | European |
| rs2239630  | chr14:23589349 | Eosinophil percentage of granulocytes         | Astle W  | 27863252 | European |
| rs2239630  | chr14:23589349 | Eosinophil percentage of white cells          | Astle W  | 27863252 | European |
| rs2239630  | chr14:23589349 | Granulocyte percentage of myeloid white cells | Astle W  | 27863252 | European |
| rs2239630  | chr14:23589349 | Monocyte count                                | Astle W  | 27863252 | European |
| rs2239630  | chr14:23589349 | Monocyte percentage of white cells            | Astle W  | 27863252 | European |
| rs2239630  | chr14:23589349 | Neutrophil percentage of granulocytes         | Astle W  | 27863252 | European |
| rs2239630  | chr14:23589349 | Neutrophil percentage of white cells          | Astle W  | 27863252 | European |
| rs2239630  | chr14:23589349 | Sum eosinophil basophil counts                | Astle W  | 27863252 | European |
| rs2239630  | chr14:23589349 | Granulocyte percentage of myeloid white cells | Astle W  | 27863252 | European |

---

|            |                |                                                      |         |          |          |
|------------|----------------|------------------------------------------------------|---------|----------|----------|
| rs2239630  | chr14:23589349 | Monocyte count                                       | Astle W | 27863252 | European |
| rs2239630  | chr14:23589349 | Monocyte percentage of white cells                   | Astle W | 27863252 | European |
| rs2239630  | chr14:23589349 | Neutrophil percentage of granulocytes                | Astle W | 27863252 | European |
| rs2239630  | chr14:23589349 | Neutrophil percentage of white cells                 | Astle W | 27863252 | European |
| rs2239630  | chr14:23589349 | Sum eosinophil basophil counts                       | Astle W | 27863252 | European |
| rs62115999 | chr19:51761614 | Self-reported ureteric obstruction or hydronephrosis | Neale B | UKBB     | European |
| rs1710398  | chr19:51726911 | Platelet count                                       | Astle W | 27863252 | European |
| rs1710398  | chr19:51726911 | Plateletcrit                                         | Astle W | 27863252 | European |
| rs1710398  | chr19:51726911 | White blood cell count                               | Astle W | 27863252 | European |
| rs12459419 | chr19:51728477 | Eosinophil count                                     | Astle W | 27863252 | European |
| rs12459419 | chr19:51728477 | Granulocyte count                                    | Astle W | 27863252 | European |
| rs12459419 | chr19:51728477 | Lymphocyte count                                     | Astle W | 27863252 | European |
| rs12459419 | chr19:51728477 | Monocyte count                                       | Astle W | 27863252 | European |
| rs12459419 | chr19:51728477 | Myeloid white cell count                             | Astle W | 27863252 | European |
| rs12459419 | chr19:51728477 | Platelet count                                       | Astle W | 27863252 | European |
| rs12459419 | chr19:51728477 | Plateletcrit                                         | Astle W | 27863252 | European |
| rs12459419 | chr19:51728477 | Sum eosinophil basophil counts                       | Astle W | 27863252 | European |
| rs12459419 | chr19:51728477 | Sum neutrophil eosinophil counts                     | Astle W | 27863252 | European |
| rs12459419 | chr19:51728477 | White blood cell count                               | Astle W | 27863252 | European |
| rs12459419 | chr19:51728477 | Alzheimers disease                                   | IGAP    | 24162737 | European |
| rs12459419 | chr19:51728477 | Blood protein levels                                 | Suhre K | 28240269 | European |
| rs12459419 | chr19:51728477 | Plateletcrit                                         | Astle W | 27863252 | European |

**Supplementary table 4:** Sensitivity analysis results for the bidirectional 2-sample MR.

| AD as outcome | exposure | method | nsnp | pval | or | or_lci95 | or_uci95 |
|---------------|----------|--------|------|------|----|----------|----------|
|---------------|----------|--------|------|------|----|----------|----------|

|                                |                 |   |          |       |       |       |
|--------------------------------|-----------------|---|----------|-------|-------|-------|
| blood gene expression of CD33  | MR Egger        | 5 | 0.059    | 1.206 | 1.066 | 1.365 |
| blood gene expression of CD33  | Weighted median | 5 | 8.32E-05 | 1.162 | 1.078 | 1.252 |
| blood gene expression of CD33  | IVW             | 5 | 3.25E-05 | 1.156 | 1.080 | 1.238 |
| blood gene expression of CD33  | Simple mode     | 5 | 0.049    | 1.212 | 1.059 | 1.386 |
| blood gene expression of CD33  | Weighted mode   | 5 | 0.019    | 1.166 | 1.078 | 1.261 |
| Serum protein level of CD33    | IVW             | 2 | 0.002    | 1.084 | 1.031 | 1.139 |
| CD33 on CD14+ monocyte         | MR Egger        | 5 | 0.088    | 1.017 | 1.082 | 1.151 |
| CD33 on CD14+ monocyte         | Weighted median | 5 | 2.41E-06 | 1.038 | 1.067 | 1.096 |
| CD33 on CD14+ monocyte         | IVW             | 5 | 0.001    | 1.024 | 1.061 | 1.100 |
| CD33 on CD14+ monocyte         | Simple mode     | 5 | 0.854    | 0.912 | 0.992 | 1.079 |
| CD33 on CD14+ monocyte         | Weighted mode   | 5 | 0.007    | 1.045 | 1.073 | 1.102 |
| CD33 on CD66b++ myeloid cell   | MR Egger        | 4 | 0.042    | 1.079 | 1.139 | 1.203 |
| CD33 on CD66b++ myeloid cell   | Weighted median | 4 | 2.75E-05 | 1.037 | 1.070 | 1.105 |
| CD33 on CD66b++ myeloid cell   | IVW             | 4 | 0.022    | 1.009 | 1.065 | 1.124 |
| CD33 on CD66b++ myeloid cell   | Simple mode     | 4 | 0.824    | 0.860 | 0.983 | 1.125 |
| CD33 on CD66b++ myeloid cell   | Weighted mode   | 4 | 0.015    | 1.052 | 1.086 | 1.122 |
| CD33 on CD33dim HLA DR+ CD11b+ | MR Egger        | 6 | 0.032    | 1.035 | 1.092 | 1.152 |
| CD33 on CD33dim HLA DR+ CD11b+ | Weighted median | 6 | 3.01E-05 | 1.030 | 1.058 | 1.086 |
| CD33 on CD33dim HLA DR+ CD11b+ | IVW             | 6 | 0.006    | 1.016 | 1.055 | 1.095 |
| CD33 on CD33dim HLA DR+ CD11b+ | Simple mode     | 6 | 0.638    | 0.873 | 0.973 | 1.084 |
| CD33 on CD33dim HLA DR+ CD11b+ | Weighted mode   | 6 | 0.004    | 1.044 | 1.074 | 1.104 |
| CD33 on CD33dim HLA DR+ CD11b- | MR Egger        | 5 | 0.074    | 1.024 | 1.093 | 1.165 |
| CD33 on CD33dim HLA DR+ CD11b- | Weighted median | 5 | 1.08E-04 | 1.028 | 1.057 | 1.088 |
| CD33 on CD33dim HLA DR+ CD11b- | IVW             | 5 | 0.015    | 1.011 | 1.055 | 1.102 |
| CD33 on CD33dim HLA DR+ CD11b- | Simple mode     | 5 | 0.587    | 0.850 | 0.963 | 1.091 |
| CD33 on CD33dim HLA DR+ CD11b- | Weighted mode   | 5 | 0.007    | 1.045 | 1.075 | 1.105 |

|                                                       |                 |   |          |       |       |       |
|-------------------------------------------------------|-----------------|---|----------|-------|-------|-------|
| CD33 on basophil                                      | MR Egger        | 7 | 0.013    | 1.053 | 1.113 | 1.176 |
| CD34 on basophil                                      | Weighted median | 7 | 1.20E-04 | 1.025 | 1.052 | 1.080 |
| CD35 on basophil                                      | IVW             | 7 | 0.009    | 1.011 | 1.046 | 1.082 |
| CD36 on basophil                                      | Simple mode     | 7 | 0.424    | 0.844 | 0.950 | 1.069 |
| CD37 on basophil                                      | Weighted mode   | 7 | 0.007    | 1.029 | 1.059 | 1.089 |
| CD33 on CD33dim HLA DR-                               | MR Egger        | 6 | 0.031    | 1.044 | 1.113 | 1.188 |
| CD33 on CD33dim HLA DR-                               | Weighted median | 6 | 3.19E-07 | 1.043 | 1.071 | 1.100 |
| CD33 on CD33dim HLA DR-                               | IVW             | 6 | 0.006    | 1.016 | 1.057 | 1.100 |
| CD33 on CD33dim HLA DR-                               | Simple mode     | 6 | 0.431    | 0.815 | 0.940 | 1.083 |
| CD33 on CD33dim HLA DR-                               | Weighted mode   | 6 | 0.003    | 1.047 | 1.074 | 1.102 |
| CD33 on Immature Myeloid-Derived Suppressor Cells     | MR Egger        | 6 | 0.023    | 1.048 | 1.108 | 1.172 |
| CD33 on Immature Myeloid-Derived Suppressor Cells     | Weighted median | 6 | 4.72E-05 | 1.029 | 1.058 | 1.087 |
| CD33 on Immature Myeloid-Derived Suppressor Cells     | IVW             | 6 | 0.001    | 1.020 | 1.052 | 1.086 |
| CD33 on Immature Myeloid-Derived Suppressor Cells     | Simple mode     | 6 | 0.504    | 0.879 | 0.966 | 1.062 |
| CD33 on Immature Myeloid-Derived Suppressor Cells     | Weighted mode   | 6 | 0.011    | 1.030 | 1.060 | 1.092 |
| CD33 on Granulocytic Myeloid-Derived Suppressor Cells | MR Egger        | 3 | 0.228    | 1.034 | 1.131 | 1.238 |
| CD33 on Granulocytic Myeloid-Derived Suppressor Cells | Weighted median | 3 | 2.55E-04 | 1.032 | 1.071 | 1.111 |
| CD33 on Granulocytic Myeloid-Derived Suppressor Cells | IVW             | 3 | 0.038    | 1.004 | 1.065 | 1.130 |
| CD33 on Granulocytic Myeloid-Derived Suppressor Cells | Simple mode     | 3 | 0.705    | 0.906 | 1.029 | 1.168 |
| CD33 on Granulocytic Myeloid-Derived Suppressor Cells | Weighted mode   | 3 | 0.063    | 1.036 | 1.077 | 1.119 |
| CD33 on CD33+ HLA DR+                                 | MR Egger        | 3 | 0.133    | 1.063 | 1.110 | 1.158 |
| CD33 on CD33+ HLA DR+                                 | Weighted median | 3 | 1.55E-05 | 1.031 | 1.058 | 1.086 |
| CD33 on CD33+ HLA DR+                                 | IVW             | 3 | 0.026    | 1.007 | 1.056 | 1.109 |
| CD33 on CD33+ HLA DR+                                 | Simple mode     | 3 | 0.593    | 0.842 | 0.959 | 1.093 |
| CD33 on CD33+ HLA DR+                                 | Weighted mode   | 3 | 0.041    | 1.038 | 1.066 | 1.094 |
| CD33 on CD33+ HLA DR+ CD14dim                         | MR Egger        | 3 | 0.133    | 1.063 | 1.109 | 1.158 |

|                |                                                    |                 |      |          |       |          |          |
|----------------|----------------------------------------------------|-----------------|------|----------|-------|----------|----------|
|                | CD33 on CD33+ HLA DR+ CD14dim                      | Weighted median | 3    | 3.37E-06 | 1.034 | 1.059    | 1.085    |
|                | CD33 on CD33+ HLA DR+ CD14dim                      | IVW             | 3    | 0.024    | 1.007 | 1.057    | 1.109    |
|                | CD33 on CD33+ HLA DR+ CD14dim                      | Simple mode     | 3    | 0.580    | 0.843 | 0.958    | 1.089    |
|                | CD33 on CD33+ HLA DR+ CD14dim                      | Weighted mode   | 3    | 0.036    | 1.041 | 1.067    | 1.094    |
|                | CD33 on CD33+ HLA DR+ CD14-                        | MR Egger        | 3    | 0.133    | 1.062 | 1.109    | 1.158    |
|                | CD33 on CD33+ HLA DR+ CD14-                        | Weighted median | 3    | 1.11E-05 | 1.032 | 1.058    | 1.085    |
|                | CD33 on CD33+ HLA DR+ CD14-                        | IVW             | 3    | 0.027    | 1.006 | 1.056    | 1.108    |
|                | CD33 on CD33+ HLA DR+ CD14-                        | Simple mode     | 3    | 0.606    | 0.840 | 0.960    | 1.096    |
|                | CD33 on CD33+ HLA DR+ CD14-                        | Weighted mode   | 3    | 0.038    | 1.039 | 1.066    | 1.093    |
|                | CD33 on Monocytic Myeloid-Derived Suppressor Cells | MR Egger        | 3    | 0.156    | 1.057 | 1.116    | 1.177    |
|                | CD33 on Monocytic Myeloid-Derived Suppressor Cells | Weighted median | 3    | 2.17E-05 | 1.032 | 1.060    | 1.089    |
|                | CD33 on Monocytic Myeloid-Derived Suppressor Cells | IVW             | 3    | 0.033    | 1.005 | 1.059    | 1.116    |
|                | CD33 on Monocytic Myeloid-Derived Suppressor Cells | Simple mode     | 3    | 0.550    | 0.834 | 0.953    | 1.088    |
|                | CD33 on Monocytic Myeloid-Derived Suppressor Cells | Weighted mode   | 3    | 0.039    | 1.043 | 1.072    | 1.102    |
| AD as exposure | outcome                                            | method          | nsnp | pval     | or    | or_lci95 | or_uci95 |
|                | blood gene expression of CD33                      | MR Egger        | 6    | 0.501    | 1.051 | 0.921    | 1.200    |
|                | blood gene expression of CD33                      | Weighted median | 6    | 0.068    | 1.074 | 0.995    | 1.160    |
|                | blood gene expression of CD33                      | IVW             | 6    | 0.014    | 1.082 | 1.016    | 1.153    |
|                | blood gene expression of CD33                      | Simple mode     | 6    | 0.179    | 1.095 | 0.977    | 1.226    |
|                | blood gene expression of CD33                      | Weighted mode   | 6    | 0.196    | 1.065 | 0.980    | 1.157    |
|                | Serum protein level of CD33                        | MR Egger        | 18   | 0.392    | 0.877 | 0.960    | 1.051    |
|                | Serum protein level of CD33                        | Weighted median | 18   | 0.168    | 0.852 | 0.936    | 1.028    |
|                | Serum protein level of CD33                        | IVW             | 18   | 0.499    | 0.915 | 0.978    | 1.044    |
|                | Serum protein level of CD33                        | Simple mode     | 18   | 0.604    | 0.803 | 0.954    | 1.134    |
|                | Serum protein level of CD33                        | Weighted mode   | 18   | 0.128    | 0.839 | 0.924    | 1.018    |
|                | CD33 on CD14+ monocyte                             | MR Egger        | 17   | 0.129    | 1.173 | 0.966    | 1.424    |

|                                |                 |    |       |       |       |       |
|--------------------------------|-----------------|----|-------|-------|-------|-------|
| CD33 on CD14+ monocyte         | Weighted median | 17 | 0.280 | 1.091 | 0.932 | 1.278 |
| CD33 on CD14+ monocyte         | IVW             | 17 | 0.325 | 1.068 | 0.937 | 1.218 |
| CD33 on CD14+ monocyte         | Simple mode     | 17 | 0.290 | 1.142 | 0.901 | 1.447 |
| CD33 on CD14+ monocyte         | Weighted mode   | 17 | 0.305 | 1.089 | 0.930 | 1.275 |
| CD33 on CD66b++ myeloid cell   | MR Egger        | 17 | 0.610 | 1.070 | 0.829 | 1.382 |
| CD33 on CD66b++ myeloid cell   | Weighted median | 17 | 0.712 | 1.033 | 0.869 | 1.229 |
| CD33 on CD66b++ myeloid cell   | IVW             | 17 | 0.606 | 1.044 | 0.886 | 1.231 |
| CD33 on CD66b++ myeloid cell   | Simple mode     | 17 | 0.981 | 0.997 | 0.757 | 1.312 |
| CD33 on CD66b++ myeloid cell   | Weighted mode   | 17 | 0.907 | 1.011 | 0.848 | 1.204 |
| CD33 on CD33dim HLA DR+ CD11b+ | MR Egger        | 17 | 0.112 | 1.173 | 0.975 | 1.411 |
| CD33 on CD33dim HLA DR+ CD11b+ | Weighted median | 17 | 0.185 | 1.115 | 0.949 | 1.310 |
| CD33 on CD33dim HLA DR+ CD11b+ | IVW             | 17 | 0.194 | 1.085 | 0.959 | 1.228 |
| CD33 on CD33dim HLA DR+ CD11b+ | Simple mode     | 17 | 0.388 | 1.113 | 0.879 | 1.408 |
| CD33 on CD33dim HLA DR+ CD11b+ | Weighted mode   | 17 | 0.228 | 1.101 | 0.947 | 1.280 |
| CD33 on CD33dim HLA DR+ CD11b- | MR Egger        | 17 | 0.119 | 1.169 | 0.972 | 1.406 |
| CD33 on CD33dim HLA DR+ CD11b- | Weighted median | 17 | 0.071 | 1.151 | 0.988 | 1.340 |
| CD33 on CD33dim HLA DR+ CD11b- | IVW             | 17 | 0.177 | 1.088 | 0.962 | 1.230 |
| CD33 on CD33dim HLA DR+ CD11b- | Simple mode     | 17 | 0.061 | 1.259 | 1.006 | 1.574 |
| CD33 on CD33dim HLA DR+ CD11b- | Weighted mode   | 17 | 0.107 | 1.144 | 0.980 | 1.336 |
| CD33 on basophil               | MR Egger        | 17 | 0.231 | 1.123 | 0.936 | 1.349 |
| CD34 on basophil               | Weighted median | 17 | 0.443 | 1.067 | 0.904 | 1.261 |
| CD35 on basophil               | IVW             | 17 | 0.676 | 1.026 | 0.909 | 1.159 |
| CD36 on basophil               | Simple mode     | 17 | 0.319 | 1.134 | 0.893 | 1.440 |
| CD37 on basophil               | Weighted mode   | 17 | 0.525 | 1.061 | 0.888 | 1.266 |
| CD33 on CD33dim HLA DR-        | MR Egger        | 17 | 0.293 | 1.113 | 0.918 | 1.348 |
| CD33 on CD33dim HLA DR-        | Weighted median | 17 | 0.689 | 1.034 | 0.877 | 1.220 |

|                                                       |                 |    |       |       |       |       |
|-------------------------------------------------------|-----------------|----|-------|-------|-------|-------|
| CD33 on CD33dim HLA DR-                               | IVW             | 17 | 0.654 | 1.030 | 0.906 | 1.170 |
| CD33 on CD33dim HLA DR-                               | Simple mode     | 17 | 0.418 | 1.123 | 0.854 | 1.476 |
| CD33 on CD33dim HLA DR-                               | Weighted mode   | 17 | 0.664 | 1.040 | 0.874 | 1.237 |
| CD33 on Immature Myeloid-Derived Suppressor Cells     | MR Egger        | 17 | 0.424 | 1.080 | 0.899 | 1.299 |
| CD33 on Immature Myeloid-Derived Suppressor Cells     | Weighted median | 17 | 0.955 | 1.005 | 0.846 | 1.193 |
| CD33 on Immature Myeloid-Derived Suppressor Cells     | IVW             | 17 | 0.702 | 1.024 | 0.907 | 1.156 |
| CD33 on Immature Myeloid-Derived Suppressor Cells     | Simple mode     | 17 | 0.366 | 1.131 | 0.873 | 1.465 |
| CD33 on Immature Myeloid-Derived Suppressor Cells     | Weighted mode   | 17 | 0.773 | 1.026 | 0.866 | 1.215 |
| CD33 on Granulocytic Myeloid-Derived Suppressor Cells | MR Egger        | 17 | 0.438 | 1.087 | 0.885 | 1.335 |
| CD33 on Granulocytic Myeloid-Derived Suppressor Cells | Weighted median | 17 | 0.705 | 1.036 | 0.864 | 1.241 |
| CD33 on Granulocytic Myeloid-Derived Suppressor Cells | IVW             | 17 | 0.755 | 1.022 | 0.892 | 1.171 |
| CD33 on Granulocytic Myeloid-Derived Suppressor Cells | Simple mode     | 17 | 0.608 | 1.070 | 0.830 | 1.380 |
| CD33 on Granulocytic Myeloid-Derived Suppressor Cells | Weighted mode   | 17 | 0.651 | 1.041 | 0.876 | 1.238 |
| CD33 on CD33+ HLA DR+                                 | MR Egger        | 17 | 0.247 | 1.153 | 0.914 | 1.454 |
| CD33 on CD33+ HLA DR+                                 | Weighted median | 17 | 0.239 | 1.103 | 0.937 | 1.300 |
| CD33 on CD33+ HLA DR+                                 | IVW             | 17 | 0.473 | 1.058 | 0.907 | 1.233 |
| CD33 on CD33+ HLA DR+                                 | Simple mode     | 17 | 0.995 | 0.999 | 0.780 | 1.279 |
| CD33 on CD33+ HLA DR+                                 | Weighted mode   | 17 | 0.397 | 1.075 | 0.914 | 1.265 |
| CD33 on CD33+ HLA DR+ CD14dim                         | MR Egger        | 17 | 0.180 | 1.178 | 0.938 | 1.480 |
| CD33 on CD33+ HLA DR+ CD14dim                         | Weighted median | 17 | 0.264 | 1.096 | 0.933 | 1.286 |
| CD33 on CD33+ HLA DR+ CD14dim                         | IVW             | 17 | 0.377 | 1.071 | 0.920 | 1.247 |
| CD33 on CD33+ HLA DR+ CD14dim                         | Simple mode     | 17 | 0.925 | 1.012 | 0.795 | 1.287 |
| CD33 on CD33+ HLA DR+ CD14dim                         | Weighted mode   | 17 | 0.324 | 1.093 | 0.921 | 1.298 |
| CD33 on CD33+ HLA DR+ CD14-                           | MR Egger        | 17 | 0.272 | 1.141 | 0.910 | 1.432 |
| CD33 on CD33+ HLA DR+ CD14-                           | Weighted median | 17 | 0.215 | 1.111 | 0.940 | 1.314 |
| CD33 on CD33+ HLA DR+ CD14-                           | IVW             | 17 | 0.495 | 1.054 | 0.907 | 1.224 |

|                                                    |                 |    |       |       |       |       |
|----------------------------------------------------|-----------------|----|-------|-------|-------|-------|
| CD33 on CD33+ HLA DR+ CD14-                        | Simple mode     | 17 | 0.852 | 1.024 | 0.803 | 1.305 |
| CD33 on CD33+ HLA DR+ CD14-                        | Weighted mode   | 17 | 0.418 | 1.070 | 0.912 | 1.256 |
| CD33 on Monocytic Myeloid-Derived Suppressor Cells | MR Egger        | 17 | 0.113 | 1.186 | 0.972 | 1.448 |
| CD33 on Monocytic Myeloid-Derived Suppressor Cells | Weighted median | 17 | 0.387 | 1.077 | 0.910 | 1.275 |
| CD33 on Monocytic Myeloid-Derived Suppressor Cells | IVW             | 17 | 0.771 | 1.022 | 0.885 | 1.179 |
| CD33 on Monocytic Myeloid-Derived Suppressor Cells | Simple mode     | 17 | 0.994 | 0.999 | 0.776 | 1.286 |
| CD33 on Monocytic Myeloid-Derived Suppressor Cells | Weighted mode   | 17 | 0.432 | 1.069 | 0.909 | 1.256 |

or: odds ratio; lci95: lower 95% confidential interval; uci95: upper95% confidential interval.

**Supplementary table 5:** IVs used in the reverse MR analyses(AD as exposure, CD33 as outcome).

| exposure | samplesize | se     | pval     | beta    | pos         | SNP         | EA | OA | eaf |
|----------|------------|--------|----------|---------|-------------|-------------|----|----|-----|
| AD       | 63926      | 0.0183 | 1.55E-16 | -0.1508 | rs679515    | 1:207750568 | C  | T  | NA  |
| AD       | 63926      | 0.0154 | 4.02E-28 | 0.1693  | rs6733839   | 2:127892810 | T  | C  | NA  |
| AD       | 63926      | 0.0431 | 4.47E-12 | 0.298   | rs114812713 | 6:41034000  | C  | G  | NA  |
| AD       | 63926      | 0.0166 | 5.80E-09 | -0.0967 | rs34665982  | 6:32560306  | C  | T  | NA  |
| AD       | 63926      | 0.0148 | 2.93E-08 | -0.0821 | rs9381563   | 6:47432637  | T  | C  | NA  |
| AD       | 63926      | 0.0182 | 1.56E-08 | -0.1028 | rs11767557  | 7:143109139 | C  | T  | NA  |
| AD       | 63926      | 0.0158 | 3.49E-17 | 0.1333  | rs867230    | 8:27468503  | A  | C  | NA  |
| AD       | 63926      | 0.0153 | 8.34E-10 | 0.0936  | rs73223431  | 8:27219987  | T  | C  | NA  |
| AD       | 63926      | 0.0154 | 4.64E-08 | 0.0841  | rs11257242  | 10:11721119 | G  | C  | NA  |
| AD       | 63926      | 0.0149 | 1.19E-16 | -0.1232 | rs1582763   | 11:60021948 | A  | G  | NA  |
| AD       | 63926      | 0.0148 | 5.81E-16 | 0.1198  | rs3851179   | 11:85868640 | C  | T  | NA  |
| AD       | 63926      | 0.0144 | 9.70E-11 | 0.0935  | rs3740688   | 11:47380340 | T  | G  | NA  |
| AD       | 63926      | 0.0157 | 8.73E-09 | -0.0906 | rs12590654  | 14:92938855 | A  | G  | NA  |
| AD       | 63926      | 0.0811 | 2.27E-11 | -0.5425 | rs72654445  | 19:45417200 | A  | G  | NA  |

|    |       |        |           |         |             |             |   |   |    |
|----|-------|--------|-----------|---------|-------------|-------------|---|---|----|
| AD | 63926 | 0.0305 | 6.40E-53  | -0.4673 | rs7412      | 19:45412079 | T | C | NA |
| AD | 63926 | 0.0436 | 1.51E-103 | 0.942   | rs1081105   | 19:45412955 | C | A | NA |
| AD | 63926 | 0.0169 | 2.56E-10  | -0.1071 | rs12151021  | 19:1050874  | G | A | NA |
| AD | 63926 | 0.0713 | 3.20E-11  | -0.4735 | rs111278137 | 19:45215081 | A | G | NA |
| AD | 63926 | 0.0366 | 1.00E-200 | 1.1354  | rs147711004 | 19:45337918 | A | G | NA |
| AD | 63926 | 0.0851 | 6.43E-09  | -0.4938 | rs139136389 | 19:45427136 | T | C | NA |
| AD | 63926 | 0.0645 | 6.62E-18  | 0.5561  | rs150685845 | 19:45675180 | G | A | NA |

EA: effect allele; OA: other allele; eaf: allele frequency of effect allele; NA: not available.

**Supplementary table 6:** Phenoscanner search results of the IVs used in the reverse MR analyses (AD as exposure, CD33 as outcome).

| snp        | position       | trait                                                        | study      | pmid     | ancestry    |
|------------|----------------|--------------------------------------------------------------|------------|----------|-------------|
| rs679515   | chr1:207750568 | Alzheimers disease                                           | IGAP       | 24162737 | European    |
| rs679515   | chr1:207750568 | Alzheimers disease in APOE e4 carriers                       | Jun G      | 25778476 | Unspecified |
| rs679515   | chr1:207750568 | Illnesses of mother: alzheimers disease or dementia          | Neale B    | UKBB     | European    |
| rs6733839  | chr2:127892810 | Alzheimers disease                                           | IGAP       | 24162737 | European    |
| rs6733839  | chr2:127892810 | Alzheimers disease in APOE e4 carriers                       | Jun G      | 25778476 | Unspecified |
| rs6733839  | chr2:127892810 | Alzheimers disease late onset                                | IGAP       | 24162737 | European    |
| rs6733839  | chr2:127892810 | Dementia and core Alzheimers disease neuropathologic changes | Beecham GW | 25188341 | Unspecified |
| rs6733839  | chr2:127892810 | Illnesses of father: alzheimers disease or dementia          | Neale B    | UKBB     | European    |
| rs6733839  | chr2:127892810 | Illnesses of mother: alzheimers disease or dementia          | Neale B    | UKBB     | European    |
| rs34665982 | chr6:32560306  | Hematocrit                                                   | Astle W    | 27863252 | European    |
| rs34665982 | chr6:32560306  | Hemoglobin concentration                                     | Astle W    | 27863252 | European    |
| rs34665982 | chr6:32560306  | High light scatter percentage of red cells                   | Astle W    | 27863252 | European    |
| rs34665982 | chr6:32560306  | High light scatter reticulocyte count                        | Astle W    | 27863252 | European    |

|            |                |                                            |                 |          |          |
|------------|----------------|--------------------------------------------|-----------------|----------|----------|
| rs34665982 | chr6:32560306  | Lymphocyte count                           | Astle W         | 27863252 | European |
| rs34665982 | chr6:32560306  | Mean corpuscular hemoglobin concentration  | Astle W         | 27863252 | European |
| rs34665982 | chr6:32560306  | Red blood cell count                       | Astle W         | 27863252 | European |
| rs34665982 | chr6:32560306  | Reticulocyte count                         | Astle W         | 27863252 | European |
| rs34665982 | chr6:32560306  | Reticulocyte fraction of red cells         | Astle W         | 27863252 | European |
| rs34665982 | chr6:32560306  | White blood cell count                     | Astle W         | 27863252 | European |
| rs34665982 | chr6:32560306  | Inflammatory bowel disease                 | IBDGC           | 26192919 | European |
| rs34665982 | chr6:32560306  | Ulcerative colitis                         | IBDGC           | 26192919 | European |
| rs9381563  | chr6:47432637  | High light scatter percentage of red cells | Astle W         | 27863252 | European |
| rs9381563  | chr6:47432637  | High light scatter reticulocyte count      | Astle W         | 27863252 | European |
| rs9381563  | chr6:47432637  | Immature fraction of reticulocytes         | Astle W         | 27863252 | European |
| rs9381563  | chr6:47432637  | Mean platelet volume                       | Astle W         | 27863252 | European |
| rs9381563  | chr6:47432637  | Platelet count                             | Astle W         | 27863252 | European |
| rs9381563  | chr6:47432637  | Platelet distribution width                | Astle W         | 27863252 | European |
| rs9381563  | chr6:47432637  | Red cell distribution width                | Astle W         | 27863252 | European |
| rs9381563  | chr6:47432637  | Reticulocyte count                         | Astle W         | 27863252 | European |
| rs9381563  | chr6:47432637  | Reticulocyte fraction of red cells         | Astle W         | 27863252 | European |
| rs9381563  | chr6:47432637  | Late onset Alzheimers disease              | Naj AC          | 21460841 | European |
| rs9381563  | chr6:47432637  | Alzheimers disease                         | IGAP            | 24162737 | European |
| rs9381563  | chr6:47432637  | Comparative height size at age 10          | Neale B         | UKBB     | European |
| rs9381563  | chr6:47432637  | Height                                     | Neale B         | UKBB     | European |
| rs11767557 | chr7:143109139 | Alzheimers disease                         | Hollingsworth P | 21460840 | European |
| rs11767557 | chr7:143109139 | Late onset Alzheimers disease              | Naj AC          | 21460841 | European |
| rs11767557 | chr7:143109139 | Alzheimers disease                         | IGAP            | 24162737 | European |
| rs11767557 | chr7:143109139 | Alzheimers disease late onset              | Naj AC          | 21460841 | European |

|            |                |                                                     |                |          |             |
|------------|----------------|-----------------------------------------------------|----------------|----------|-------------|
| rs11767557 | chr7:143109139 | Alzheimer disease                                   | Naj AC         | 21460841 | European    |
| rs867230   | chr8:27468503  | Illnesses of mother: alzheimers disease or dementia | Neale B        | UKBB     | European    |
| rs73223431 | chr8:27219987  | Alzheimers disease                                  | IGAP           | 24162737 | European    |
| rs11257242 | chr10:11721119 | Alzheimers disease                                  | IGAP           | 24162737 | European    |
| rs1582763  | chr11:60021948 | Granulocyte count                                   | Astle W        | 27863252 | European    |
| rs1582763  | chr11:60021948 | Lymphocyte percentage of white cells                | Astle W        | 27863252 | European    |
| rs1582763  | chr11:60021948 | Myeloid white cell count                            | Astle W        | 27863252 | European    |
| rs1582763  | chr11:60021948 | Neutrophil count                                    | Astle W        | 27863252 | European    |
| rs1582763  | chr11:60021948 | Neutrophil percentage of white cells                | Astle W        | 27863252 | European    |
| rs1582763  | chr11:60021948 | Sum basophil neutrophil counts                      | Astle W        | 27863252 | European    |
| rs1582763  | chr11:60021948 | Sum neutrophil eosinophil counts                    | Astle W        | 27863252 | European    |
| rs1582763  | chr11:60021948 | Late onset Alzheimers disease                       | Naj AC         | 21460841 | European    |
| rs1582763  | chr11:60021948 | Alzheimers disease                                  | IGAP           | 24162737 | European    |
| rs1582763  | chr11:60021948 | Alzheimers disease in APOE e4 carriers              | Jun G          | 25778476 | Unspecified |
| rs1582763  | chr11:60021948 | Heel bone mineral density                           | Neale B        | UKBB     | European    |
| rs1582763  | chr11:60021948 | Heel bone mineral density left                      | Neale B        | UKBB     | European    |
| rs1582763  | chr11:60021948 | Heel bone mineral density right                     | Neale B        | UKBB     | European    |
| rs3851179  | chr11:85868640 | High light scatter percentage of red cells          | Astle W        | 27863252 | European    |
| rs3851179  | chr11:85868640 | High light scatter reticulocyte count               | Astle W        | 27863252 | European    |
| rs3851179  | chr11:85868640 | Alzheimers disease                                  | Harold D       | 19734902 | European    |
| rs3851179  | chr11:85868640 | Alzheimers disease                                  | Seshadri S     | 20460622 | European    |
| rs3851179  | chr11:85868640 | Alzheimers disease                                  | Furney SJ      | 21116278 | European    |
| rs3851179  | chr11:85868640 | Alzheimers disease                                  | Hollingworth P | 21460840 | European    |
| rs3851179  | chr11:85868640 | Late onset Alzheimers disease                       | Naj AC         | 21460841 | European    |
| rs3851179  | chr11:85868640 | Alzheimers disease                                  | IGAP           | 24162737 | European    |

|           |                |                                        |          |          |             |
|-----------|----------------|----------------------------------------|----------|----------|-------------|
| rs3851179 | chr11:85868640 | Alzheimers disease                     | Harold D | 19734902 | European    |
| rs3851179 | chr11:85868640 | Alzheimers disease in APOE e4 carriers | Jun G    | 25778476 | Unspecified |
| rs3851179 | chr11:85868640 | Alzheimer disease                      | Harold D | 19734902 | European    |
| rs3740688 | chr11:47380340 | Alzheimers disease                     | IGAP     | 24162737 | European    |
| rs3740688 | chr11:47380340 | Age at menarche                        | Neale B  | UKBB     | European    |
| rs3740688 | chr11:47380340 | Arm fat mass left                      | Neale B  | UKBB     | European    |
| rs3740688 | chr11:47380340 | Arm fat mass right                     | Neale B  | UKBB     | European    |
| rs3740688 | chr11:47380340 | Arm fat percentage left                | Neale B  | UKBB     | European    |
| rs3740688 | chr11:47380340 | Arm fat percentage right               | Neale B  | UKBB     | European    |
| rs3740688 | chr11:47380340 | Body fat percentage                    | Neale B  | UKBB     | European    |
| rs3740688 | chr11:47380340 | Body mass index                        | Neale B  | UKBB     | European    |
| rs3740688 | chr11:47380340 | Comparative body size at age 10        | Neale B  | UKBB     | European    |
| rs3740688 | chr11:47380340 | Fluid intelligence score               | Neale B  | UKBB     | European    |
| rs3740688 | chr11:47380340 | Height                                 | Neale B  | UKBB     | European    |
| rs3740688 | chr11:47380340 | Hip circumference                      | Neale B  | UKBB     | European    |
| rs3740688 | chr11:47380340 | Impedance of leg left                  | Neale B  | UKBB     | European    |
| rs3740688 | chr11:47380340 | Impedance of leg right                 | Neale B  | UKBB     | European    |
| rs3740688 | chr11:47380340 | Leg fat mass left                      | Neale B  | UKBB     | European    |
| rs3740688 | chr11:47380340 | Leg fat mass right                     | Neale B  | UKBB     | European    |
| rs3740688 | chr11:47380340 | Leg fat percentage left                | Neale B  | UKBB     | European    |
| rs3740688 | chr11:47380340 | Leg fat percentage right               | Neale B  | UKBB     | European    |
| rs3740688 | chr11:47380340 | Miserableness                          | Neale B  | UKBB     | European    |
| rs3740688 | chr11:47380340 | Nervous feelings                       | Neale B  | UKBB     | European    |
| rs3740688 | chr11:47380340 | Neuroticism score                      | Neale B  | UKBB     | European    |
| rs3740688 | chr11:47380340 | Sitting height                         | Neale B  | UKBB     | European    |

|            |                |                                                                       |                   |          |          |
|------------|----------------|-----------------------------------------------------------------------|-------------------|----------|----------|
| rs3740688  | chr11:47380340 | Suffer from nerves                                                    | Neale B           | UKBB     | European |
| rs3740688  | chr11:47380340 | Trunk fat mass                                                        | Neale B           | UKBB     | European |
| rs3740688  | chr11:47380340 | Trunk fat percentage                                                  | Neale B           | UKBB     | European |
| rs3740688  | chr11:47380340 | Usual walking pace                                                    | Neale B           | UKBB     | European |
| rs3740688  | chr11:47380340 | Waist circumference                                                   | Neale B           | UKBB     | European |
| rs3740688  | chr11:47380340 | Weight                                                                | Neale B           | UKBB     | European |
| rs3740688  | chr11:47380340 | Whole body fat mass                                                   | Neale B           | UKBB     | European |
| rs12590654 | chr14:92938855 | Alzheimers disease                                                    | IGAP              | 24162737 | European |
| rs7412     | chr19:45412079 | High light scatter percentage of red cells                            | Astle W           | 27863252 | European |
| rs7412     | chr19:45412079 | High light scatter reticulocyte count                                 | Astle W           | 27863252 | European |
| rs7412     | chr19:45412079 | Immature fraction of reticulocytes                                    | Astle W           | 27863252 | European |
| rs7412     | chr19:45412079 | Plateletcrit                                                          | Astle W           | 27863252 | European |
| rs7412     | chr19:45412079 | Red cell distribution width                                           | Astle W           | 27863252 | European |
| rs7412     | chr19:45412079 | Reticulocyte count                                                    | Astle W           | 27863252 | European |
| rs7412     | chr19:45412079 | Reticulocyte fraction of red cells                                    | Astle W           | 27863252 | European |
| rs7412     | chr19:45412079 | Coronary artery disease                                               | CARDIoGRAMplusC4D | 26343387 | Mixed    |
| rs7412     | chr19:45412079 | Myocardial infarction                                                 | CARDIoGRAMplusC4D | 26343387 | Mixed    |
| rs7412     | chr19:45412079 | Age-related macular degeneration                                      | Fritsche LG       | 26691988 | European |
| rs7412     | chr19:45412079 | High density lipoprotein                                              | GLGC              | 24097068 | European |
| rs7412     | chr19:45412079 | Low density lipoprotein                                               | GLGC              | 24097068 | European |
| rs7412     | chr19:45412079 | Total cholesterol                                                     | GLGC              | 24097068 | European |
| rs7412     | chr19:45412079 | Triglycerides                                                         | GLGC              | 24097068 | European |
| rs7412     | chr19:45412079 | APOB apolipoprotein B                                                 | Hopewell          | 23100282 | European |
| rs7412     | chr19:45412079 | APOB apolipoprotein B response after 40mg daily simvastatin treatment | Hopewell          | 23100282 | European |
| rs7412     | chr19:45412079 | LDL cholesterol                                                       | Smith EN          | 20838585 | European |

|        |                |                                                                                                                       |                     |          |             |
|--------|----------------|-----------------------------------------------------------------------------------------------------------------------|---------------------|----------|-------------|
| rs7412 | chr19:45412079 | LDL cholesterol                                                                                                       | Asselbergs          | 23063622 | European    |
| rs7412 | chr19:45412079 | LDL cholesterol                                                                                                       | Rasmussen Torvik LJ | 23067351 | African     |
| rs7412 | chr19:45412079 | LDL cholesterol                                                                                                       | Hopewell            | 23100282 | European    |
| rs7412 | chr19:45412079 | LDL cholesterol among a group where cancer diabetes hyperhypothyroidism and LDL altering medications were not present | Rasmussen Torvik LJ | 23067351 | African     |
| rs7412 | chr19:45412079 | LDL cholesterol change with statins                                                                                   | Thompson            | 20031582 | Mixed       |
| rs7412 | chr19:45412079 | LDL cholesterol response after 40mg daily simvastatin treatment                                                       | Hopewell            | 23100282 | European    |
| rs7412 | chr19:45412079 | LDL cholesterol response to statins baseline LDL cholesterol                                                          | Chasman DI          | 22331829 | European    |
| rs7412 | chr19:45412079 | LDL cholesterol response to statins fractional change in LDL cholesterol                                              | Chasman DI          | 22331829 | European    |
| rs7412 | chr19:45412079 | LDL cholesterol response to statins residuals of the measure of fractional change in LDL cholesterol                  | Chasman DI          | 22331829 | European    |
| rs7412 | chr19:45412079 | Late onset Alzheimers disease                                                                                         | Naj AC              | 20885792 | Unspecified |
| rs7412 | chr19:45412079 | Late onset Alzheimers disease                                                                                         | Hu X                | 21390209 | European    |
| rs7412 | chr19:45412079 | Lipoprotein associated phospholipase A2 activity Lp2                                                                  | Chu AY              | 23118302 | European    |
| rs7412 | chr19:45412079 | Total cholesterol                                                                                                     | Asselbergs          | 23063622 | European    |
| rs7412 | chr19:45412079 | Alzheimers disease                                                                                                    | IGAP                | 24162737 | European    |
| rs7412 | chr19:45412079 | Cholesterol total                                                                                                     | Surakka I           | 25961943 | European    |
| rs7412 | chr19:45412079 | Cholesterol total                                                                                                     | Nagy R              | 28270201 | European    |
| rs7412 | chr19:45412079 | Coronary artery disease                                                                                               | Nelson CP           | 28714975 | Mixed       |
| rs7412 | chr19:45412079 | Coronary artery disease                                                                                               | van der Harst P     | 29212778 | Mixed       |
| rs7412 | chr19:45412079 | Coronary artery disease                                                                                               | van der Harst P     | 29212778 | Mixed       |
| rs7412 | chr19:45412079 | Coronary artery disease                                                                                               | van der Harst P     | 29212778 | Mixed       |
| rs7412 | chr19:45412079 | HDL cholesterol                                                                                                       | Nagy R              | 28270201 | European    |
| rs7412 | chr19:45412079 | High light scatter reticulocyte count                                                                                 | Astle W             | 27863252 | European    |
| rs7412 | chr19:45412079 | High light scatter reticulocyte percentage of red cells                                                               | Astle W             | 27863252 | European    |

|        |                |                                                                                                                       |                     |          |            |
|--------|----------------|-----------------------------------------------------------------------------------------------------------------------|---------------------|----------|------------|
| rs7412 | chr19:45412079 | Ideal cardiovascular health clinical and behavioural                                                                  | Allen NB            | 27179730 | European   |
| rs7412 | chr19:45412079 | Immature fraction of reticulocytes                                                                                    | Astle W             | 27863252 | European   |
| rs7412 | chr19:45412079 | LDL cholesterol                                                                                                       | Rasmussen Torvik LJ | 23067351 | African    |
| rs7412 | chr19:45412079 | LDL cholesterol levels                                                                                                | Spracklen CN        | 28334899 | East Asian |
| rs7412 | chr19:45412079 | LDL cholesterol levels                                                                                                | Zhu Y               | 28371326 | East Asian |
| rs7412 | chr19:45412079 | Lipid metabolism phenotypes                                                                                           | Kettunen J          | 22286219 | European   |
| rs7412 | chr19:45412079 | Lipid traits                                                                                                          | Wu Y                | 24023260 | Filipino   |
| rs7412 | chr19:45412079 | Lipid traits                                                                                                          | Wu Y                | 24023260 | Filipino   |
| rs7412 | chr19:45412079 | Lipoprotein a levels                                                                                                  | Mack S              | 28512139 | European   |
| rs7412 | chr19:45412079 | Lipoprotein associated phospholipase A2 activity change in response to darapladib treatment in cardiovascular disease | Yeo A               | 28753643 | Mixed      |
| rs7412 | chr19:45412079 | Lipoprotein phospholipase A2 activity in cardiovascular disease                                                       | Yeo A               | 28753643 | Mixed      |
| rs7412 | chr19:45412079 | Lipoproteina levels adjusted for apolipoproteina isoforms                                                             | Mack S              | 28512139 | European   |
| rs7412 | chr19:45412079 | Low density lipoprotein cholesterol                                                                                   | Southam L           | 28548082 | Mixed      |
| rs7412 | chr19:45412079 | Metabolite levels lipoprotein measures                                                                                | Kettunen J          | 27005778 | European   |
| rs7412 | chr19:45412079 | Pulse pressure                                                                                                        | Warren HR           | 28135244 | European   |
| rs7412 | chr19:45412079 | Red cell distribution width                                                                                           | Astle W             | 27863252 | European   |
| rs7412 | chr19:45412079 | Response to statin therapy LDL C                                                                                      | Chasman DI          | 22331829 | European   |
| rs7412 | chr19:45412079 | Reticulocyte count                                                                                                    | Astle W             | 27863252 | European   |
| rs7412 | chr19:45412079 | Reticulocyte fraction of red cells                                                                                    | Astle W             | 27863252 | European   |
| rs7412 | chr19:45412079 | Total cholesterol levels                                                                                              | Spracklen CN        | 28334899 | East Asian |
| rs7412 | chr19:45412079 | Total cholesterol levels                                                                                              | Southam L           | 28548082 | Mixed      |
| rs7412 | chr19:45412079 | Arm fat mass left                                                                                                     | Neale B             | UKBB     | European   |
| rs7412 | chr19:45412079 | Arm fat mass right                                                                                                    | Neale B             | UKBB     | European   |
| rs7412 | chr19:45412079 | Arm fat percentage left                                                                                               | Neale B             | UKBB     | European   |

|        |                |                                                                                                    |         |      |          |
|--------|----------------|----------------------------------------------------------------------------------------------------|---------|------|----------|
| rs7412 | chr19:45412079 | Arm fat percentage right                                                                           | Neale B | UKBB | European |
| rs7412 | chr19:45412079 | Blood clot in the leg                                                                              | Neale B | UKBB | European |
| rs7412 | chr19:45412079 | Body fat percentage                                                                                | Neale B | UKBB | European |
| rs7412 | chr19:45412079 | Body mass index                                                                                    | Neale B | UKBB | European |
| rs7412 | chr19:45412079 | Chronic ischaemic heart disease                                                                    | Neale B | UKBB | European |
| rs7412 | chr19:45412079 | Fathers age at death                                                                               | Neale B | UKBB | European |
| rs7412 | chr19:45412079 | Hip circumference                                                                                  | Neale B | UKBB | European |
| rs7412 | chr19:45412079 | Illnesses of father: alzheimers disease or dementia                                                | Neale B | UKBB | European |
| rs7412 | chr19:45412079 | Illnesses of father: heart disease                                                                 | Neale B | UKBB | European |
| rs7412 | chr19:45412079 | Illnesses of mother: alzheimers disease or dementia                                                | Neale B | UKBB | European |
| rs7412 | chr19:45412079 | Illnesses of mother: none of the above, group 1                                                    | Neale B | UKBB | European |
| rs7412 | chr19:45412079 | Leg fat mass left                                                                                  | Neale B | UKBB | European |
| rs7412 | chr19:45412079 | Leg fat mass right                                                                                 | Neale B | UKBB | European |
| rs7412 | chr19:45412079 | Leg fat percentage right                                                                           | Neale B | UKBB | European |
| rs7412 | chr19:45412079 | Medication for cholesterol, blood pressure or diabetes: cholesterol lowering medication            | Neale B | UKBB | European |
| rs7412 | chr19:45412079 | Medication for cholesterol, blood pressure or diabetes: none of the above                          | Neale B | UKBB | European |
| rs7412 | chr19:45412079 | Medication for pain relief, constipation, heartburn: aspirin                                       | Neale B | UKBB | European |
| rs7412 | chr19:45412079 | No treatment with medication for cholesterol, blood pressure, diabetes, or take exogenous hormones | Neale B | UKBB | European |
| rs7412 | chr19:45412079 | Number of self-reported non-cancer illnesses                                                       | Neale B | UKBB | European |
| rs7412 | chr19:45412079 | Number of treatments or medications taken                                                          | Neale B | UKBB | European |
| rs7412 | chr19:45412079 | Pulse rate                                                                                         | Neale B | UKBB | European |
| rs7412 | chr19:45412079 | Pulse rate                                                                                         | Neale B | UKBB | European |
| rs7412 | chr19:45412079 | Self-reported angina                                                                               | Neale B | UKBB | European |

|        |                |                                                                     |              |          |            |
|--------|----------------|---------------------------------------------------------------------|--------------|----------|------------|
| rs7412 | chr19:45412079 | Self-reported deep venous thrombosis                                | Neale B      | UKBB     | European   |
| rs7412 | chr19:45412079 | Self-reported heart attack or myocardial infarction                 | Neale B      | UKBB     | European   |
| rs7412 | chr19:45412079 | Self-reported high cholesterol                                      | Neale B      | UKBB     | European   |
| rs7412 | chr19:45412079 | Self-reported hypertension                                          | Neale B      | UKBB     | European   |
| rs7412 | chr19:45412079 | Treatment with aspirin                                              | Neale B      | UKBB     | European   |
| rs7412 | chr19:45412079 | Treatment with atorvastatin                                         | Neale B      | UKBB     | European   |
| rs7412 | chr19:45412079 | Treatment with cholesterol lowering medication                      | Neale B      | UKBB     | European   |
| rs7412 | chr19:45412079 | Treatment with ezetimibe                                            | Neale B      | UKBB     | European   |
| rs7412 | chr19:45412079 | Treatment with lipitor 10mg tablet                                  | Neale B      | UKBB     | European   |
| rs7412 | chr19:45412079 | Treatment with rosuvastatin                                         | Neale B      | UKBB     | European   |
| rs7412 | chr19:45412079 | Treatment with simvastatin                                          | Neale B      | UKBB     | European   |
| rs7412 | chr19:45412079 | Trunk fat mass                                                      | Neale B      | UKBB     | European   |
| rs7412 | chr19:45412079 | Trunk fat percentage                                                | Neale B      | UKBB     | European   |
| rs7412 | chr19:45412079 | Vascular or heart problems diagnosed by doctor: angina              | Neale B      | UKBB     | European   |
| rs7412 | chr19:45412079 | Vascular or heart problems diagnosed by doctor: heart attack        | Neale B      | UKBB     | European   |
| rs7412 | chr19:45412079 | Vascular or heart problems diagnosed by doctor: high blood pressure | Neale B      | UKBB     | European   |
| rs7412 | chr19:45412079 | Vascular or heart problems diagnosed by doctor: none of the above   | Neale B      | UKBB     | European   |
| rs7412 | chr19:45412079 | Waist circumference                                                 | Neale B      | UKBB     | European   |
| rs7412 | chr19:45412079 | Weight                                                              | Neale B      | UKBB     | European   |
| rs7412 | chr19:45412079 | Whole body fat mass                                                 | Neale B      | UKBB     | European   |
| rs7412 | chr19:45412079 | Coronary artery disease                                             | Nelson CP    | 28714975 | Mixed      |
| rs7412 | chr19:45412079 | Low density lipoprotein                                             | Prins B      | 28887542 | European   |
| rs7412 | chr19:45412079 | Triglycerides                                                       | Prins B      | 28887542 | European   |
| rs7412 | chr19:45412079 | Total cholesterol                                                   | Prins B      | 28887542 | European   |
| rs7412 | chr19:45412079 | High density lipoprotein                                            | Spracklen CN | 28334899 | East Asian |

|           |                |                                                                                         |                 |          |            |
|-----------|----------------|-----------------------------------------------------------------------------------------|-----------------|----------|------------|
| rs7412    | chr19:45412079 | Low density lipoprotein                                                                 | Spracklen CN    | 28334899 | East Asian |
| rs7412    | chr19:45412079 | Total cholesterol                                                                       | Spracklen CN    | 28334899 | East Asian |
| rs7412    | chr19:45412079 | Triglycerides                                                                           | Spracklen CN    | 28334899 | East Asian |
| rs7412    | chr19:45412079 | Cholesterol ldl                                                                         | Chasman DI      | 22331829 | European   |
| rs7412    | chr19:45412079 | Lipid metabolism                                                                        | Kettunen J      | 22286219 | European   |
| rs7412    | chr19:45412079 | Coronary artery disease                                                                 | van der Harst P | 29212778 | Mixed      |
| rs7412    | chr19:45412079 | Coronary artery disease                                                                 | van der Harst P | 29212778 | Mixed      |
| rs1081105 | chr19:45412955 | Red cell distribution width                                                             | Astle W         | 27863252 | European   |
| rs1081105 | chr19:45412955 | Age-related macular degeneration                                                        | Fritsche LG     | 26691988 | European   |
| rs1081105 | chr19:45412955 | Alzheimers disease                                                                      | IGAP            | 24162737 | European   |
| rs1081105 | chr19:45412955 | Body fat percentage                                                                     | Neale B         | UKBB     | European   |
| rs1081105 | chr19:45412955 | Cause of death: unspecified dementia                                                    | Neale B         | UKBB     | European   |
| rs1081105 | chr19:45412955 | Illnesses of father: alzheimers disease or dementia                                     | Neale B         | UKBB     | European   |
| rs1081105 | chr19:45412955 | Illnesses of mother: alzheimers disease or dementia                                     | Neale B         | UKBB     | European   |
| rs1081105 | chr19:45412955 | Leg fat percentage left                                                                 | Neale B         | UKBB     | European   |
| rs1081105 | chr19:45412955 | Leg fat percentage right                                                                | Neale B         | UKBB     | European   |
| rs1081105 | chr19:45412955 | Medication for cholesterol, blood pressure or diabetes: cholesterol lowering medication | Neale B         | UKBB     | European   |
| rs1081105 | chr19:45412955 | Self-reported high cholesterol                                                          | Neale B         | UKBB     | European   |
| rs1081105 | chr19:45412955 | Treatment with atorvastatin                                                             | Neale B         | UKBB     | European   |
| rs1081105 | chr19:45412955 | Treatment with cholesterol lowering medication                                          | Neale B         | UKBB     | European   |
| rs1081105 | chr19:45412955 | Treatment with ezetimibe                                                                | Neale B         | UKBB     | European   |
| rs1081105 | chr19:45412955 | Treatment with lipitor 10mg tablet                                                      | Neale B         | UKBB     | European   |
| rs1081105 | chr19:45412955 | Treatment with simvastatin                                                              | Neale B         | UKBB     | European   |
| rs1081105 | chr19:45412955 | Waist circumference                                                                     | Neale B         | UKBB     | European   |

|             |                |                                                                                         |                 |          |          |
|-------------|----------------|-----------------------------------------------------------------------------------------|-----------------|----------|----------|
| rs1081105   | chr19:45412955 | C-reactive protein                                                                      | Prins B         | 28887542 | European |
| rs12151021  | chr19:1050874  | Lymphocyte count                                                                        | Astle W         | 27863252 | European |
| rs12151021  | chr19:1050874  | Mean corpuscular hemoglobin concentration                                               | Astle W         | 27863252 | European |
| rs12151021  | chr19:1050874  | Red cell distribution width                                                             | Astle W         | 27863252 | European |
| rs12151021  | chr19:1050874  | Alzheimers disease                                                                      | IGAP            | 24162737 | European |
| rs147711004 | chr19:45337918 | Illnesses of father: alzheimers disease or dementia                                     | Neale B         | UKBB     | European |
| rs147711004 | chr19:45337918 | Illnesses of mother: alzheimers disease or dementia                                     | Neale B         | UKBB     | European |
| rs147711004 | chr19:45337918 | Illnesses of mother: none of the above, group 1                                         | Neale B         | UKBB     | European |
| rs147711004 | chr19:45337918 | Illnesses of siblings: alzheimers disease or dementia                                   | Neale B         | UKBB     | European |
| rs147711004 | chr19:45337918 | Leg fat mass left                                                                       | Neale B         | UKBB     | European |
| rs147711004 | chr19:45337918 | Leg fat percentage left                                                                 | Neale B         | UKBB     | European |
| rs147711004 | chr19:45337918 | Medication for cholesterol, blood pressure or diabetes: cholesterol lowering medication | Neale B         | UKBB     | European |
| rs147711004 | chr19:45337918 | Self-reported high cholesterol                                                          | Neale B         | UKBB     | European |
| rs147711004 | chr19:45337918 | Treatment with simvastatin                                                              | Neale B         | UKBB     | European |
| rs147711004 | chr19:45337918 | Waist circumference                                                                     | Neale B         | UKBB     | European |
| rs147711004 | chr19:45337918 | Low density lipoprotein                                                                 | Prins B         | 28887542 | European |
| rs147711004 | chr19:45337918 | Coronary artery disease                                                                 | van der Harst P | 29212778 | Mixed    |
| rs147711004 | chr19:45337918 | Coronary artery disease                                                                 | van der Harst P | 29212778 | Mixed    |
| rs150685845 | chr19:45675180 | Alzheimers disease                                                                      | IGAP            | 24162737 | European |
| rs150685845 | chr19:45675180 | Illnesses of father: alzheimers disease or dementia                                     | Neale B         | UKBB     | European |
| rs150685845 | chr19:45675180 | Illnesses of mother: alzheimers disease or dementia                                     | Neale B         | UKBB     | European |
